# Supplementary material for: Microbiome of Nodules and Roots of Soybean and Common Bean: Searching for Differences Associated with Contrasting Performances in Symbiotic Nitrogen Fixation
Source: MDPI journal article supplement (doi:10.3390/ijms231912035), 2022-10-10
Supplement: s1 [file s1]

## Microbiome of Nodules and Roots of Soybean and Common Bean: Searching for Differences Associated with Contrasting Performances in Symbiotic Nitrogen Fixation

Flávia Raquel Bender<sup>1,2</sup>, Leonardo Cardoso Alves<sup>3</sup>, João Fernando Marques da Silva<sup>3</sup>, Renan Augusto Ribeiro<sup>4</sup>, Giuliano Pauli<sup>3</sup>, Marco Antonio Nogueira<sup>2,4</sup>, Mariangela Hungria<sup>1,2,4,\*</sup>

<sup>1</sup>Department of Biotechnology, Universidade Estadual de Londrina, C.P. 10011, Londrina 86057-970, PR, Brazil

<sup>2</sup>Soil Biotechnology Laboratory, Embrapa Soja, C.P. 4006, Londrina 86085-981, PR, Brazil

<sup>3</sup>SuperBac Biotechnology Solutions, Estr. Vitória de São Pedro, 685, Mandaguari 86975-000, PR, Brazil

<sup>4</sup>CNPq, SHIS QI 1 Conjunto B, Blocos A, B, C e D, Lago Sul, Brasília 71605-001, DF, Brazil

\*Corresponding author: mariangela.hungria@embrapa.br; biotecnologia.solo@hotmail.com

### Supplementary Material

**Table S1.** Localization, geographic coordinates, altitudes and climatic characteristics of the sites where the soybean experiment was performed and of soil source for the common bean experiment.

| Experiment     | Site            | State     | Coordinates <sup>1</sup> | Altitude<br>(m) <sup>2</sup> | Climate<br>Type <sup>3</sup> | Average<br>annual lower<br>temperature<br>(°C) | Average<br>annual higher<br>temperature<br>(°C) | Average<br>annual<br>rainfall<br>(mm) |
|----------------|-----------------|-----------|--------------------------|------------------------------|------------------------------|------------------------------------------------|-------------------------------------------------|---------------------------------------|
| Soybean        | Lutécia         | São Paulo | 22°2'S<br>50°25'W        | 457                          | <i>Cfa</i>                   | 18.3                                           | 28.3                                            | 1,314                                 |
| Common<br>bean | Ponta<br>Grossa | Paraná    | 25°13'S 50°10'W          | 880                          | <i>Cfb</i>                   | 8.4                                            | 25.9                                            | 1,507                                 |

<sup>1</sup> Latitude, longitude

<sup>2</sup> Above sea level

<sup>3</sup> According to Köppen-Geiger classification

**Table S2.** Chemical properties and granulometric fractions (0 – 20 cm), and population of compatible soybean (Lutécia) or common bean (Ponta Grossa) rhizobia (0 – 10 cm) in the soils where plants were grown.

| Site         | Chemical properties |                   |                     |       |       |                                    |       |                  |       |       | Rhizobia          | Granulometry |                    |       |
|--------------|---------------------|-------------------|---------------------|-------|-------|------------------------------------|-------|------------------|-------|-------|-------------------|--------------|--------------------|-------|
|              | C                   | pH                | P                   | H+Al  | Al    | K                                  | Ca+Mg | CEC <sup>b</sup> | SB    | V     |                   | Clay         | Silt               | Sand  |
|              | g dm <sup>-3</sup>  | CaCl <sub>2</sub> | mg dm <sup>-3</sup> | ----- | ----- | cmol <sub>c</sub> dm <sup>-3</sup> | ----- | -----            | ----- | %     |                   | -----        | g kg <sup>-1</sup> | ----- |
| Lutécia      | 23.00               | 5.60              | 18.99               | 1.60  | 0.00  | 2.60                               | 4.90  | 9.10             | 7.50  | 82.41 | $7.6 \times 10^1$ | 119          | 11                 | 870   |
| Ponta Grossa | 21.70               | 5.68              | 2.55                | 3.63  | 0.00  | 0.11                               | 4.55  | 8.29             | 4.66  | 56.21 | $4.6 \times 10^4$ | 238          | 30                 | 732   |

**Table S3.** Results of the relative abundance (%) of the genera present in the microbiome of nodules of soybean non-inoculated (control), inoculated with *Bradyrhizobium* spp., or co-inoculated adding *Azospirillum brasilense*.

| Genus                                                                                | Soybean Nodules |       |       |       |       |       |            |       |       |       |       |       |               |       |       |       |       |       |
|--------------------------------------------------------------------------------------|-----------------|-------|-------|-------|-------|-------|------------|-------|-------|-------|-------|-------|---------------|-------|-------|-------|-------|-------|
|                                                                                      | Control         |       |       |       |       |       | Inoculated |       |       |       |       |       | Co-inoculated |       |       |       |       |       |
|                                                                                      | R1              | R2    | R3    | R4    | R5    | R6    | R1         | R2    | R3    | R4    | R5    | R6    | R1            | R2    | R3    | R4    | R5    | R6    |
| <i>Bradyrhizobium</i>                                                                | 97.76           | 99.62 | 98.36 | 98.52 | 99.93 | 91.55 | 99.30      | 99.16 | 99.77 | 99.09 | 99.58 | 98.33 | 96.33         | 98.18 | 97.55 | 92.25 | 94.55 | 96.45 |
| <i>Streptomyces</i>                                                                  | -               | -     | 0.11  | 0.16  | -     | 1.23  | 0.10       | -     | -     | 0.08  | -     | 0.11  | 0.20          | -     | 0.23  | 0.28  | 0.22  | 0.41  |
| <i>Niastella</i>                                                                     | -               | -     | -     | 0.04  | -     | -     | -          | -     | -     | -     | -     | -     | -             | -     | -     | -     | -     | -     |
| <i>Sphingomonas</i>                                                                  | -               | -     | -     | 0.20  | -     | -     | -          | -     | -     | -     | -     | 0.05  | 0.23          | -     | -     | 0.23  | 0.08  | -     |
| <i>Massilia</i>                                                                      | -               | -     | -     | -     | -     | -     | -          | -     | -     | -     | -     | -     | -             | 0.05  | -     | -     | 0.04  | -     |
| <i>Allorhizobium</i> – <i>Neorhizobium</i> – <i>Pararhizobium</i> – <i>Rhizobium</i> | -               | -     | 0.04  | 0.05  | -     | 1.75  | -          | -     | -     | -     | -     | -     | 0.22          | -     | 0.21  | 0.30  | 0.12  | 0.22  |
| <i>Burkholderia</i> – <i>Caballeronia</i> – <i>Paraburkholderia</i>                  | -               | -     | -     | -     | -     | -     | -          | -     | -     | -     | -     | -     | 0.07          | -     | -     | -     | 0.03  | -     |
| <i>Bacillus</i>                                                                      | -               | -     | -     | 0.03  | -     | 0.09  | -          | -     | -     | -     | -     | -     | -             | -     | 0.03  | -     | 0.07  | 0.05  |
| <i>Novosphingobium</i>                                                               | 0.06            | -     | -     | -     | -     | 0.46  | -          | -     | -     | -     | -     | -     | -             | 0.15  | -     | 0.33  | -     | 0.12  |
| <i>Phenyllobacterium</i>                                                             | -               | -     | -     | -     | -     | -     | -          | -     | -     | -     | -     | -     | 0.05          | -     | -     | -     | 0.07  | -     |
| <i>Mycobacterium</i>                                                                 | -               | -     | 0.05  | -     | -     | -     | 0.04       | -     | -     | -     | -     | -     | -             | -     | -     | 0.11  | -     | -     |
| <i>Mesorhizobium</i>                                                                 | -               | -     | -     | -     | -     | -     | -          | -     | -     | -     | -     | 0.04  | -             | 0.14  | -     | 0.15  | 0.09  | -     |
| <i>Dongia</i>                                                                        | -               | -     | 0.01  | 0.04  | -     | -     | -          | -     | -     | 0.04  | -     | -     | 0.11          | -     | 0.09  | 0.07  | -     | -     |
| <i>Methylobacterium</i>                                                              | -               | -     | -     | -     | -     | -     | -          | 0.02  | -     | -     | -     | -     | 0.11          | 0.10  | 0.07  | 0.08  | 0.08  | -     |
| <i>Dyella</i>                                                                        | -               | -     | 0.05  | 0.18  | -     | -     | -          | -     | -     | -     | -     | -     | -             | -     | 0.03  | 0.07  | -     | -     |
| <i>Amycolatopsis</i>                                                                 | -               | -     | -     | -     | -     | -     | -          | -     | -     | -     | 0.02  | -     | -             | -     | 0.03  | -     | 0.10  | 0.07  |
| <i>Actinoplanes</i>                                                                  | -               | -     | -     | -     | -     | -     | -          | -     | -     | -     | -     | -     | 0.02          | -     | -     | -     | -     | -     |
| <i>Terriglobus</i>                                                                   | -               | -     | 0.06  | 0.17  | -     | -     | -          | -     | -     | 0.05  | -     | -     | -             | 0.08  | 0.05  | 0.07  | 0.08  | -     |
| <i>Chitinophaga</i>                                                                  | -               | -     | -     | 0.13  | -     | -     | -          | -     | -     | -     | 0.04  | 0.02  | -             | 0.07  | -     | 0.13  | -     | -     |
| <i>Promicromonospora</i>                                                             | -               | -     | -     | -     | -     | -     | -          | 0.04  | -     | -     | -     | -     | -             | -     | -     | -     | -     | -     |
| <i>Candidatus_Udaeobacter</i>                                                        | -               | -     | -     | -     | 0.03  | -     | -          | -     | -     | -     | -     | -     | -             | -     | -     | -     | -     | -     |
| <i>Caulobacter</i>                                                                   | -               | -     | -     | -     | -     | -     | -          | -     | -     | -     | -     | -     | 0.04          | 0.12  | 0.11  | -     | -     | -     |
| <i>Devosia</i>                                                                       | -               | -     | -     | -     | -     | -     | -          | -     | -     | -     | -     | -     | -             | -     | -     | 0.03  | -     | -     |
| <i>Mitsuaria</i>                                                                     | -               | -     | -     | -     | -     | -     | -          | 0.03  | -     | 0.04  | -     | -     | -             | -     | -     | 0.38  | -     | -     |

|                               |      |      |      |      |   |      |  |   |      |      |       |      |      |      |      |      |      |      |      |
|-------------------------------|------|------|------|------|---|------|--|---|------|------|-------|------|------|------|------|------|------|------|------|
| <i>Enterobacter</i>           | -    | -    | -    | -    | - | 0.11 |  | - | -    | -    | -     | -    | -    | 0.40 | -    | 0.05 | -    | -    | -    |
| <i>Pseudomonas</i>            | 0.16 | 0.06 | 0.02 | 0.04 | - | 0.21 |  | - | 0.02 | 0.04 | 0.07  | 0.11 | 0.03 | 0.06 | 0.08 | -    | 0.39 | 0.04 | 0.09 |
| <i>Asticcacaulis</i>          | -    | -    | -    | -    | - | -    |  | - | -    | -    | 0.01  | -    | -    | -    | -    | -    | -    | -    | -    |
| <i>Lysobacter</i>             | -    | -    | -    | -    | - | -    |  | - | -    | -    | -     | -    | -    | -    | -    | 0.02 | -    | -    | -    |
| <i>Dyadobacter</i>            | 0.09 | -    | -    | -    | - | -    |  | - | -    | -    | -     | -    | -    | -    | -    | -    | 0.13 | -    | -    |
| <i>Cupriavidus</i>            | -    | -    | -    | -    | - | -    |  | - | -    | -    | -     | -    | -    | -    | -    | -    | 0.39 | -    | -    |
| <i>Stenotrophomonas</i>       | 0.14 | -    | -    | -    | - | 0.70 |  | - | -    | -    | -     | -    | -    | -    | -    | -    | -    | -    | -    |
| <i>Labrys</i>                 | -    | -    | -    | -    | - | -    |  | - | -    | -    | 0.03  | -    | -    | -    | -    | -    | -    | -    | -    |
| <i>Acidipila</i>              | -    | -    | 0.01 | -    | - | -    |  | - | -    | -    | -     | -    | -    | -    | -    | -    | -    | -    | -    |
| <i>Comamonas</i>              | -    | -    | -    | -    | - | 0.43 |  | - | -    | -    | -     | -    | -    | -    | -    | -    | -    | -    | -    |
| <i>Mucilaginibacter</i>       | -    | -    | -    | -    | - | -    |  | - | -    | -    | 0.02  | -    | -    | -    | -    | 0.02 | -    | -    | -    |
| <i>Chryseobacterium</i>       | -    | -    | -    | -    | - | 0.58 |  | - | -    | -    | -     | -    | -    | -    | -    | -    | 0.57 | -    | -    |
| <i>Rhodoplanes</i>            | -    | -    | -    | -    | - | -    |  | - | -    | -    | -     | -    | -    | -    | -    | -    | 0.03 | -    | -    |
| <i>Xylophilus</i>             | -    | -    | -    | -    | - | -    |  | - | -    | -    | -     | -    | -    | 0.06 | -    | -    | -    | -    | -    |
| <i>Pseudorhodoferax</i>       | -    | -    | -    | -    | - | -    |  | - | -    | -    | -     | -    | -    | -    | -    | -    | 0.05 | -    | -    |
| <i>Escherichia - Shigella</i> | -    | -    | 0.01 | 0.05 | - | -    |  | - | -    | -    | 0.01  | 0.01 | 0.02 | -    | -    | -    | 0.03 | 0.05 | -    |
| <i>Paenarthrobacter</i>       | -    | -    | -    | -    | - | -    |  | - | -    | -    | -     | -    | -    | 0.03 | -    | -    | -    | -    | -    |
| <i>Sphingobacterium</i>       | -    | -    | -    | -    | - | 0.62 |  | - | -    | -    | -     | -    | -    | 0.30 | -    | -    | -    | -    | -    |
| <i>Psychrobacter</i>          | -    | 0.06 | -    | -    | - | -    |  | - | -    | -    | -     | -    | -    | -    | -    | -    | -    | -    | -    |
| <i>Methylophilus</i>          | -    | -    | -    | -    | - | -    |  | - | -    | -    | -     | -    | -    | 0.06 | -    | -    | -    | -    | -    |
| <i>Flavobacterium</i>         | -    | -    | -    | -    | - | -    |  | - | -    | -    | -     | -    | -    | 0.21 | -    | -    | -    | -    | -    |
| <i>Kluyvera</i>               | -    | -    | -    | -    | - | -    |  | - | -    | -    | -     | -    | -    | -    | -    | -    | 0.48 | -    | -    |
| <i>Paenibacillus</i>          | -    | -    | -    | -    | - | -    |  | - | -    | -    | -     | -    | -    | -    | -    | -    | 0.03 | -    | -    |
| <i>Pseudosphingobacterium</i> | -    | -    | -    | -    | - | -    |  | - | 0.02 | -    | -     | -    | -    | -    | -    | -    | -    | -    | -    |
| <i>Kribbella</i>              | -    | -    | -    | -    | - | -    |  | - | -    | -    | 0.004 | -    | -    | -    | -    | -    | -    | 0.01 | -    |

**Table S4.** Relative abundance (%) of bacteria identified at the phylum, class, family and/or order level, and of unassigned genera present in the microbiome of nodules of soybean non-inoculated (control), inoculated with *Bradyrhizobium* spp., or co-inoculated adding *Azospirillum brasilense*.

| Genus                        | Soybean Nodules |      |      |      |    |      |  |            |      |    |      |      |      |  |               |      |      |      |      |      |
|------------------------------|-----------------|------|------|------|----|------|--|------------|------|----|------|------|------|--|---------------|------|------|------|------|------|
|                              | Control         |      |      |      |    |      |  | Inoculated |      |    |      |      |      |  | Co-inoculated |      |      |      |      |      |
|                              | R1              | R2   | R3   | R4   | R5 | R6   |  | R1         | R2   | R3 | R4   | R5   | R6   |  | R1            | R2   | R3   | R4   | R5   | R6   |
| UnC Chitinophagaceae         | -               | -    | -    | -    | -  | -    |  | -          | -    | -  | 0.03 | -    | -    |  | -             | -    | -    | -    | -    | -    |
| UnC Gammaproteobacteria I.S. | -               | -    | 0.02 | -    | -  | -    |  | -          | -    | -  | 0.03 | -    | -    |  | -             | -    | -    | -    | -    | -    |
| UnC Saccharimonadales        | -               | -    | -    | -    | -  | -    |  | -          | -    | -  | -    | -    | -    |  | -             | 0.06 | -    | 0.03 | 0.03 | -    |
| UnC Micropepsaceae           | -               | -    | -    | -    | -  | -    |  | -          | -    | -  | -    | -    | -    |  | -             | 0.06 | 0.05 | -    | -    | -    |
| UnC Acidobacteriia           | 0.05            | -    | -    | -    | -  | -    |  | -          | -    | -  | -    | -    | -    |  | -             | -    | -    | -    | -    | -    |
| UnC Acidobacteria            | -               | -    | -    | -    | -  | -    |  | -          | -    | -  | -    | -    | 0.01 |  | -             | -    | -    | -    | -    | -    |
| UnC Thermodesulfovibrionia   | 0.02            | -    | -    | -    | -  | -    |  | -          | -    | -  | -    | -    | -    |  | -             | -    | -    | -    | -    | -    |
| Unassigned                   | 1.64            | 0.05 | 0.30 | 0.22 | -  | 1.41 |  | 0.16       | 0.23 | -  | 0.11 | 0.07 | 0.04 |  | 0.47          | 0.42 | 0.43 | 2.14 | 0.59 | 0.86 |

**Table S5.** Relative abundance (%) of genera present in the microbiome of roots of soybean non-inoculated (control), inoculated with *Bradyrhizobium* spp., or co-inoculated adding *Azospirillum brasilense*.

| Genus                                                                                   | Soybean Roots |       |       |       |       |       |            |       |       |       |       |       |               |       |       |       |       |       |
|-----------------------------------------------------------------------------------------|---------------|-------|-------|-------|-------|-------|------------|-------|-------|-------|-------|-------|---------------|-------|-------|-------|-------|-------|
|                                                                                         | Control       |       |       |       |       |       | Inoculated |       |       |       |       |       | Co-inoculated |       |       |       |       |       |
|                                                                                         | R1            | R2    | R3    | R4    | R5    | R6    | R1         | R2    | R3    | R4    | R5    | R6    | R1            | R2    | R3    | R4    | R5    | R6    |
| <i>Bradyrhizobium</i>                                                                   | 4.59          | 10.51 | 8.64  | 4.41  | 9.40  | 5.61  | 13.49      | 11.31 | 18.14 | 10.08 | 8.50  | 5.89  | 41.00         | 11.37 | 37.55 | 9.92  | 12.08 | 8.66  |
| <i>Streptomyces</i>                                                                     | 19.07         | 16.99 | 17.69 | 19.85 | 20.07 | 6.70  | 17.13      | 18.66 | 14.42 | 19.47 | 15.33 | 7.57  | 6.24          | 13.46 | 10.25 | 19.26 | 17.83 | 23.20 |
| <i>Niastella</i>                                                                        | 5.83          | 5.83  | 3.90  | 2.82  | 8.41  | 2.89  | 5.17       | 3.32  | 7.62  | 5.70  | 8.89  | 7.81  | 3.34          | 7.35  | 4.21  | 6.38  | 4.10  | 4.62  |
| <i>Sphingomonas</i>                                                                     | 2.45          | 4.10  | 3.69  | 3.79  | 3.67  | 2.18  | 3.27       | 3.08  | 3.74  | 3.91  | 3.75  | 7.53  | 2.66          | 3.16  | 2.87  | 3.34  | 2.98  | 4.05  |
| <i>Massilia</i>                                                                         | 2.03          | 4.36  | 1.58  | 2.17  | 3.63  | 1.51  | 1.75       | 1.59  | 2.05  | 2.45  | 5.74  | 4.15  | 2.00          | 5.67  | 2.54  | 3.95  | 11.17 | 6.10  |
| <i>Allorhizobium</i> - <i>Neorhizobium</i> -<br><i>Pararhizobium</i> - <i>Rhizobium</i> | 3,39          | 4,05  | 5,31  | 3,47  | 4,10  | 3,68  | 6,20       | 5,13  | 4,62  | 4,85  | 2,78  | 3,77  | 2,92          | 4,69  | 4,12  | 4,35  | 3,87  | 5,30  |
| <i>Burkholderia</i> – <i>Caballeronia</i> –<br><i>Paraburkholderia</i>                  | 2.07          | 2.66  | 1.84  | 1.48  | 1.99  | 13.65 | 0.80       | 1.42  | 0.89  | 1.39  | 1.91  | 12.83 | 1.21          | 1.99  | 0.94  | 1.81  | 2.91  | 2.43  |
| <i>Bacillus</i>                                                                         | 3.38          | 4.70  | 3.80  | 3.63  | 1.19  | 1.20  | 5.72       | 2.40  | 3.27  | 3.19  | 2.33  | 0.90  | 0.32          | 2.52  | 2.44  | 3.42  | 1.18  | 1.35  |
| <i>Novosphingobium</i>                                                                  | 1.75          | 1.97  | 3.95  | 1.68  | 1.93  | 1.44  | 2.38       | 1.92  | 1.57  | 1.87  | 1.02  | 1.59  | 2.01          | 2.05  | 2.13  | 2.38  | 0.97  | 1.74  |
| <i>Phenylobacterium</i>                                                                 | 1.28          | 1.47  | 2.29  | 1.48  | 1.80  | 2.48  | 0.99       | 1.39  | 1.79  | 1.73  | 1.39  | 2.45  | 0.85          | 1.58  | 0.96  | 1.57  | 2.13  | 2.63  |
| <i>Mycobacterium</i>                                                                    | 1.18          | 1.72  | 2.70  | 2.26  | 2.08  | 2.00  | 1.90       | 2.64  | 1.42  | 1.68  | 1.75  | 0.90  | 0.50          | 0.42  | 0.58  | 1.80  | 1.91  | 2.60  |
| <i>Mesorhizobium</i>                                                                    | 2.04          | 1.87  | 2.12  | 2.14  | 2.05  | 0.98  | 1.95       | 1.86  | 1.65  | 2.11  | 1.48  | 1.60  | 0.96          | 1.76  | 0.98  | 1.42  | 1.40  | 1.22  |
| <i>Dongia</i>                                                                           | 1.43          | 1.59  | 3.30  | 1.19  | 1.93  | 0.30  | 1.78       | 1.42  | 1.62  | 1.38  | 1.59  | 0.68  | 0.80          | 1.20  | 0.92  | 0.66  | 0.36  | 0.49  |
| <i>Streptacidiphilus</i>                                                                | 0.87          | 1.44  | -     | 0.84  | 1.07  | 1.31  | 1.60       | 1.29  | 1.50  | 1.43  | 2.30  | 1.79  | 0.38          | 0.87  | 0.82  | 1.52  | 2.26  | 1.15  |
| <i>Methylobacterium</i>                                                                 | 0.78          | 0.62  | 0.75  | 1.09  | 1.50  | 1.30  | 1.15       | 1.34  | 1.21  | 1.47  | 1.44  | 0.45  | 0.56          | 1.02  | 0.81  | 1.65  | 1.69  | 1.91  |
| <i>Dyella</i>                                                                           | 0.22          | -     | 1.12  | 0.84  | 0.63  | 8.89  | 0.84       | 0.57  | 0.24  | 0.41  | 0.29  | 3.81  | 0.27          | 0.55  | 0.59  | 0.61  | 0.14  | 0.47  |
| <i>Amycolatopsis</i>                                                                    | 0.85          | -     | 0.53  | 0.88  | 1.44  | 1.61  | 0.88       | 1.18  | 1.04  | 1.09  | 1.26  | 1.24  | 0.19          | 0.98  | 0.55  | 0.83  | 2.34  | 2.28  |
| <i>Actinoplanes</i>                                                                     | 1.21          | 0.61  | 2.26  | 1.57  | 0.87  | 0.67  | 1.48       | 1.00  | 0.85  | 0.86  | 1.10  | 0.95  | 0.71          | 0.23  | 1.07  | 1.45  | 1.14  | 0.94  |
| <i>Terriglobus</i>                                                                      | 0.56          | 0.94  | 1.05  | 0.81  | 1.86  | 1.11  | 1.13       | 1.10  | 0.81  | 0.84  | 1.20  | 1.10  | 0.43          | 0.76  | 0.49  | 1.39  | 1.19  | 1.03  |
| <i>Chitinophaga</i>                                                                     | 0.75          | 1.37  | 1.00  | 1.76  | 0.91  | 0.82  | 1.31       | 1.56  | 0.59  | 0.41  | 0.77  | 1.09  | 0.53          | 1.58  | 0.68  | 0.86  | 0.36  | 0.62  |
| <i>Promicromonospora</i>                                                                | 0.88          | 0.81  | 2.25  | 1.61  | 1.06  | 2.40  | 1.02       | 1.26  | 0.58  | 0.53  | -     | -     | 0.23          | 0.15  | 0.37  | 0.55  | -     | -     |
| <i>Candidatus_Udaeobacter</i>                                                           | 0.87          | 1.42  | 1.08  | 1.15  | 0.54  | 0.58  | 0.95       | 0.82  | 0.91  | 0.92  | 1.22  | 0.71  | 0.29          | 0.29  | 0.52  | 0.30  | 0.36  | 0.34  |
| <i>Caulobacter</i>                                                                      | 0.81          | 1.67  | 1.38  | 0.83  | 0.62  | 0.49  | 0.64       | 1.18  | 0.43  | 0.82  | 0.70  | 0.41  | 0.34          | 0.29  | 0.51  | 0.72  | 0.44  | 0.53  |
| <i>Devosia</i>                                                                          | 0.68          | 0.66  | 0.77  | 0.75  | 0.43  | 0.85  | 0.95       | 0.40  | 0.56  | 0.60  | 0.43  | 0.60  | 0.40          | 0.39  | 0.56  | 0.52  | 0.23  | 0.90  |
| <i>Mitsuaria</i>                                                                        | 0.63          | 1.01  | 0.50  | 0.36  | 0.38  | -     | 1.19       | -     | -     | 0.35  | 0.40  | 0.48  | 0.29          | 0.53  | 0.49  | 0.35  | 0.44  | 0.69  |
| <i>Edaphobacter</i>                                                                     | 0.24          | 0.75  | 1.16  | 0.58  | 0.48  | 0.65  | 0.42       | 0.69  | 0.62  | 0.43  | 0.32  | 0.46  | 0.15          | 0.39  | -     | 0.49  | 0.23  | 0.28  |

|                          |      |      |      |      |      |      |      |      |      |      |      |      |      |      |      |      |      |      |
|--------------------------|------|------|------|------|------|------|------|------|------|------|------|------|------|------|------|------|------|------|
| <i>Variovorax</i>        | 0.52 | 0.55 | 0.62 | 0.45 | 0.48 | 0.23 | 0.67 | -    | 0.34 | 0.54 | 0.49 | 0.47 | 0.32 | 0.69 | 0.40 | 0.45 | 0.41 | 0.32 |
| <i>Enterobacter</i>      | -    | 0.11 | -    | -    | -    | -    | 0.39 | 0.27 | -    | 0.07 | -    | -    | 5.70 | -    | 0.19 | -    | -    | 0.13 |
| <i>Hyphomicrobium</i>    | 0.33 | 0.42 | 0.64 | 0.36 | 0.39 | -    | 0.80 | 0.53 | 0.40 | 0.50 | 0.35 | 0.35 | 0.27 | 0.31 | 0.37 | 0.36 | 0.21 | 0.42 |
| <i>Pseudomonas</i>       | 0.22 | 0.36 | -    | 0.10 | 0.19 | 0.18 | 0.45 | 0.34 | 0.08 | 0.28 | 0.27 | 0.15 | 0.21 | 0.47 | 0.35 | 0.52 | 0.38 | 0.51 |
| <i>Lechevalieria</i>     | 0.64 | 0.59 | 0.65 | 0.25 | 0.53 | -    | -    | 0.72 | -    | 0.88 | 0.49 | -    | 0.18 | -    | -    | -    | 0.42 | 0.58 |
| <i>Pseudoduganella</i>   | 0.21 | 1.09 | -    | 0.28 | -    | -    | -    | 0.59 | 0.53 | 0.45 | -    | 0.62 | 0.45 | 1.06 | -    | 0.52 | -    | -    |
| <i>Actinomadura</i>      | 0.22 | 0.24 | 0.42 | 0.60 | 0.49 | -    | -    | 0.48 | 0.33 | 0.47 | 0.37 | 0.44 | -    | 0.19 | -    | 0.31 | 0.69 | 0.23 |
| <i>Asticcacaulis</i>     | 0.55 | 0.52 | 0.26 | 0.21 | 0.39 | 0.10 | -    | 0.29 | 0.49 | 0.20 | 0.48 | 0.48 | 0.26 | 0.27 | 0.28 | 0.22 | 0.20 | 0.15 |
| <i>Lysobacter</i>        | 0.26 | 0.33 | 0.40 | 0.55 | 0.13 | 0.62 | -    | 0.30 | 0.20 | 0.33 | 0.16 | 0.46 | 0.29 | 0.28 | 0.23 | 0.17 | 0.13 | 0.24 |
| <i>Dyadobacter</i>       | 0.38 | 0.10 | 0.13 | 0.27 | 0.16 | 0.40 | -    | 0.61 | 0.18 | -    | -    | 0.19 | 0.24 | 0.26 | 0.17 | 0.51 | -    | 0.16 |
| <i>Cupriavidus</i>       | 0.24 | -    | -    | 0.10 | 0.31 | 0.17 | -    | -    | 0.28 | 0.29 | 0.39 | 0.44 | 0.29 | 0.42 | -    | 0.27 | 0.34 | -    |
| <i>Herbiconiux</i>       | 0.11 | -    | -    | 0.14 | 0.35 | 0.29 | 0.94 | 0.64 | -    | 0.53 | 0.32 | -    | -    | -    | -    | -    | -    | 0.58 |
| <i>Stenotrophomonas</i>  | 0.10 | -    | 0.13 | 0.16 | -    | 0.38 | -    | 0.51 | 0.13 | -    | -    | -    | 0.73 | 0.15 | 0.27 | 0.14 | -    | 0.14 |
| <i>Labrys</i>            | 0.16 | -    | 0.50 | 0.39 | 0.24 | 0.21 | 1.16 | -    | -    | -    | 0.34 | -    | 0.10 | -    | -    | 0.15 | 0.16 | -    |
| <i>Parafilimonas</i>     | 0.21 | 0.24 | 0.19 | 0.17 | -    | -    | 0.34 | 0.29 | 0.32 | 0.20 | 0.56 | 0.22 | 0.10 | -    | -    | 0.22 | -    | 0.16 |
| <i>Acidipila</i>         | 0.08 | 0.18 | 0.69 | 0.31 | 0.07 | 1.06 | -    | 0.13 | 0.25 | 0.11 | -    | 0.08 | -    | -    | -    | -    | -    | 0.11 |
| <i>Kutzneria</i>         | -    | 0.22 | -    | 0.10 | 0.13 | 1.43 | -    | -    | 0.24 | -    | 0.23 | 0.60 | -    | -    | -    | -    | -    | -    |
| <i>Dactylosporangium</i> | 0.42 | 0.30 | 0.26 | 0.25 | 0.13 | -    | -    | 0.32 | 0.29 | 0.24 | -    | -    | 0.15 | 0.23 | 0.23 | -    | 0.09 | -    |
| <i>Bryobacter</i>        | 0.05 | -    | 0.20 | 0.28 | -    | 0.47 | -    | -    | -    | -    | 0.36 | 0.72 | 0.12 | 0.14 | -    | -    | 0.25 | 0.29 |
| <i>Kribbella</i>         | 0.12 | 0.14 | -    | 0.40 | 0.41 | 0.37 | -    | -    | -    | 0.24 | 0.23 | 0.20 | 0.04 | -    | -    | -    | 0.37 | 0.30 |
| <i>Dokdonella</i>        | 0.35 | -    | 0.47 | 0.35 | 0.25 | 0.08 | -    | 0.21 | -    | -    | 0.27 | -    | 0.16 | 0.29 | -    | 0.18 | 0.10 | 0.12 |
| <i>Comamonas</i>         | 0.22 | -    | -    | 0.19 | -    | -    | -    | -    | 0.33 | 0.53 | -    | -    | -    | 0.39 | -    | -    | 0.31 | -    |
| <i>Actinophytocola</i>   | 0.09 | -    | -    | 0.59 | -    | -    | 0.77 | -    | 0.22 | -    | -    | 0.28 | -    | 0.37 | -    | -    | -    | -    |
| <i>Mucilaginibacter</i>  | 0.19 | -    | 0.33 | 0.25 | 0.16 | 0.24 | -    | -    | -    | 0.18 | 0.15 | -    | 0.14 | 0.04 | -    | 0.19 | 0.11 | 0.18 |
| <i>Chryseobacterium</i>  | 0.19 | -    | -    | 0.09 | -    | -    | -    | -    | -    | -    | -    | -    | -    | -    | 0.24 | 0.46 | -    | -    |
| <i>Actinospica</i>       | -    | -    | -    | 0.13 | 0.19 | 0.26 | -    | 0.28 | -    | 0.13 | 0.22 | -    | 0.06 | 0.17 | 0.11 | 0.22 | 0.15 | 0.19 |
| <i>Aridibacter</i>       | 0.14 | 0.28 | 0.23 | 0.11 | 0.11 | 0.04 | 0.19 | 0.11 | 0.12 | 0.12 | -    | -    | 0.11 | 0.10 | 0.10 | 0.15 | -    | 0.09 |
| <i>Methylopila</i>       | 0.13 | -    | 0.27 | 0.37 | 0.13 | 0.25 | -    | 0.34 | 0.16 | -    | -    | -    | 0.13 | -    | -    | -    | -    | 0.17 |
| <i>Inquilinus</i>        | 0.12 | 0.13 | 0.17 | 0.54 | 0.08 | 0.24 | -    | 0.20 | -    | 0.07 | -    | -    | -    | 0.14 | 0.06 | 0.05 | -    | -    |
| <i>Rhodoplanes</i>       | 0.20 | -    | -    | 0.17 | -    | -    | -    | -    | -    | 0.41 | 0.38 | -    | -    | -    | 0.49 | -    | -    | -    |
| <i>Pseudolabrys</i>      | 0.07 | -    | -    | 0.12 | -    | -    | -    | -    | 0.63 | -    | 0.46 | -    | -    | -    | -    | -    | 0.42 | -    |
| <i>Xylophilus</i>        | 0.15 | -    | 0.26 | 0.15 | -    | -    | -    | 0.67 | 0.14 | -    | -    | -    | 0.24 | -    | -    | -    | -    | -    |
| <i>Pseudorhodoferax</i>  | 0.13 | -    | -    | 0.14 | -    | 0.19 | 0.50 | 0.23 | -    | 0.14 | -    | -    | 0.14 | -    | -    | -    | -    | -    |

|                              |      |      |      |      |      |      |      |      |      |      |      |      |      |   |      |      |      |      |      |      |
|------------------------------|------|------|------|------|------|------|------|------|------|------|------|------|------|---|------|------|------|------|------|------|
| <i>Escherichia-Shigella</i>  | 0.10 | -    | 0.10 | 0.09 | -    | 0.08 | -    | -    | 0.08 | 0.11 | -    | 0.14 | 0.18 | - | 0.10 | 0.15 | -    | 0.08 | 0.06 | -    |
| <i>Chthoniobacter</i>        | 0.12 | 0.15 | 0.24 | 0.17 | 0.22 | -    | -    | -    | -    | -    | 0.16 | -    | -    | - | -    | -    | -    | 0.15 | 0.11 | 0.12 |
| <i>Steroidobacter</i>        | 0.08 | 0.15 | -    | 0.10 | 0.15 | 0.33 | -    | -    | -    | -    | 0.16 | 0.17 | -    | - | 0.05 | 0.09 | -    | 0.13 | -    | -    |
| <i>Sphaerisporangium</i>     | 1.36 | -    | -    | -    | -    | -    | -    | -    | -    | -    | -    | -    | -    | - | -    | -    | -    | -    | -    | -    |
| <i>Curtobacterium</i>        | -    | -    | -    | -    | -    | -    | -    | -    | -    | -    | -    | -    | -    | - | -    | -    | 0.42 | 0.50 | 0.33 | -    |
| <i>Nordella</i>              | 0.12 | -    | 0.19 | 0.10 | 0.06 | -    | -    | -    | 0.10 | 0.10 | 0.14 | -    | -    | - | 0.09 | 0.13 | 0.07 | 0.08 | -    | -    |
| <i>Paenarthrobacter</i>      | 0.04 | 0.30 | -    | 0.05 | -    | -    | 0.23 | -    | -    | -    | 0.12 | -    | -    | - | 0.17 | -    | -    | 0.22 | -    | -    |
| <i>Sphingobacterium</i>      | -    | -    | -    | -    | -    | -    | -    | -    | -    | -    | -    | -    | -    | - | 0.20 | -    | -    | -    | -    | -    |
| <i>Nocardioides</i>          | 0.12 | -    | -    | 0.53 | 0.03 | -    | 0.31 | -    | -    | -    | -    | -    | -    | - | -    | -    | -    | 0.08 | -    | 0.05 |
| <i>Rhizobacter</i>           | 0.35 | -    | 0.51 | 0.15 | -    | -    | -    | -    | -    | -    | -    | -    | -    | - | -    | -    | -    | -    | -    | -    |
| <i>Ralstonia</i>             | 0.04 | -    | -    | -    | -    | -    | -    | -    | -    | -    | -    | -    | 0.95 | - | -    | -    | -    | -    | -    | -    |
| <i>Pelomonas</i>             | 0.16 | -    | -    | 0.10 | -    | -    | -    | -    | -    | 0.50 | -    | -    | -    | - | 0.22 | -    | -    | -    | -    | -    |
| <i>Candidatus_Solibacter</i> | -    | -    | -    | 0.35 | 0.25 | -    | -    | -    | -    | -    | 0.26 | -    | -    | - | -    | -    | -    | -    | -    | -    |
| <i>Terrabacter</i>           | 0.12 | -    | -    | -    | 0.31 | -    | -    | -    | -    | -    | 0.42 | -    | -    | - | -    | -    | -    | -    | -    | -    |
| <i>Marmoricola</i>           | 0.12 | -    | 0.26 | 0.09 | -    | -    | -    | -    | 0.17 | -    | -    | -    | -    | - | -    | -    | -    | 0.17 | -    | -    |
| <i>Roseateles</i>            | -    | -    | -    | -    | -    | -    | -    | -    | -    | -    | -    | -    | -    | - | 0.20 | -    | -    | 0.60 | -    | -    |
| <i>Reyranella</i>            | -    | -    | -    | 0.26 | 0.28 | -    | -    | -    | -    | 0.24 | -    | -    | -    | - | -    | -    | -    | -    | -    | -    |
| <i>Lysinimonas</i>           | 0.13 | -    | 0.64 | -    | -    | -    | -    | -    | -    | -    | -    | -    | -    | - | -    | -    | -    | -    | -    | -    |
| <i>Rhodopseudomonas</i>      | 0.12 | -    | 0.20 | 0.18 | -    | 0.24 | -    | -    | -    | -    | -    | -    | -    | - | -    | -    | -    | -    | -    | -    |
| <i>Psychrobacter</i>         | -    | -    | -    | -    | -    | -    | -    | 0.25 | -    | -    | -    | -    | -    | - | -    | -    | -    | 0.37 | -    | -    |
| <i>Micromonospora</i>        | -    | -    | -    | -    | -    | -    | -    | -    | -    | -    | -    | -    | -    | - | -    | -    | -    | -    | -    | 0.43 |
| <i>Methylophilus</i>         | -    | -    | -    | -    | -    | 0.12 | -    | -    | -    | 0.17 | -    | -    | -    | - | 0.14 | 0.14 | -    | -    | -    | -    |
| <i>Terrimicrobium</i>        | 0.15 | -    | -    | 0.12 | -    | -    | -    | 0.10 | 0.11 | -    | -    | -    | 0.06 | - | -    | 0.08 | -    | -    | -    | -    |
| <i>Leifsonia</i>             | -    | -    | -    | 0.08 | -    | 0.32 | -    | -    | -    | -    | -    | -    | 0.21 | - | -    | -    | -    | -    | -    | -    |
| <i>Flavobacterium</i>        | 0.06 | -    | -    | 0.12 | -    | -    | -    | -    | 0.08 | -    | -    | -    | -    | - | 0.06 | -    | -    | -    | -    | -    |
| <i>Microvirga</i>            | 0.05 | 0.23 | -    | 0.10 | 0.09 | -    | -    | -    | -    | -    | -    | -    | -    | - | -    | -    | -    | -    | -    | -    |
| <i>Leptothrix</i>            | -    | -    | -    | -    | -    | -    | -    | -    | -    | -    | -    | -    | -    | - | -    | -    | -    | -    | 0.47 | -    |
| <i>Pseudonocardia</i>        | 0.10 | -    | -    | 0.30 | -    | -    | -    | -    | -    | -    | -    | -    | -    | - | -    | -    | -    | -    | -    | 0.05 |
| <i>Granulicella</i>          | -    | -    | -    | -    | -    | 0.44 | -    | -    | -    | -    | -    | -    | -    | - | -    | -    | -    | -    | -    | -    |
| <i>Solirubrobacter</i>       | 0.19 | -    | -    | 0.24 | -    | -    | -    | -    | -    | -    | -    | -    | -    | - | -    | -    | -    | -    | -    | -    |
| <i>Aeromicrobium</i>         | -    | -    | -    | 0.10 | -    | -    | -    | 0.33 | -    | -    | -    | -    | -    | - | -    | -    | -    | -    | -    | -    |
| <i>Catenulispora</i>         | -    | -    | -    | -    | -    | 0.36 | -    | -    | -    | -    | 0.03 | -    | -    | - | -    | -    | -    | -    | -    | -    |
| <i>Flavisolibacter</i>       | 0.06 | -    | -    | -    | -    | -    | -    | 0.12 | -    | -    | -    | -    | 0.12 | - | -    | -    | -    | -    | 0.06 | -    |



|                              |      |      |      |      |      |      |
|------------------------------|------|------|------|------|------|------|
| Pedomicrobium                | 0.04 | -    | -    | 0.09 | -    | -    |
| Jatrophihabitans             | 0.12 | -    | -    | 0.16 | -    | -    |
| Shinella                     | -    | -    | -    | -    | -    | 0.28 |
| Brevundimonas                | -    | -    | -    | -    | -    | -    |
| Pseudoxanthomonas            | -    | 0.11 | -    | -    | -    | -    |
| Pantoea                      | -    | -    | -    | 0.26 | -    | -    |
| Kitasatospora                | 0.22 | -    | -    | -    | -    | -    |
| Sorangium                    | -    | -    | -    | 0.21 | -    | -    |
| Bosea                        | 0.10 | -    | -    | 0.10 | -    | -    |
| Acidothermus                 | -    | -    | -    | 0.12 | -    | -    |
| Couchioplanes                | 0.17 | -    | -    | -    | -    | -    |
| Occallatibacter              | 0.16 | -    | 0.26 | 0.19 | 0.25 | 0.52 |
| Achromobacter                | -    | -    | 0.04 | -    | -    | -    |
| Actinomycetospora            | 0.05 | -    | -    | 0.10 | -    | -    |
| Kibdelosporangium            | -    | -    | -    | 0.15 | -    | -    |
| Intrasporangium              | -    | -    | -    | 0.15 | -    | -    |
| Haliangium                   | 0.14 | -    | -    | 0.01 | -    | -    |
| Ensifer                      | 0.08 | -    | -    | 0.15 | -    | -    |
| Quadrisphaera                | -    | -    | -    | 0.14 | -    | -    |
| Sphingobium                  | 0.09 | -    | -    | 0.05 | -    | -    |
| Blastocatella                | -    | -    | -    | -    | -    | -    |
| Luteolibacter                | 0.05 | -    | -    | 0.07 | -    | -    |
| Gemmata                      | 0.05 | -    | -    | 0.07 | -    | -    |
| Agromyces                    | -    | -    | -    | 0.05 | -    | -    |
| Lacunisphaera                | 0.07 | -    | -    | 0.05 | -    | -    |
| Luteimonas                   | -    | -    | -    | 0.11 | -    | -    |
| Bdellovibrio                 | 0.10 | -    | -    | -    | -    | -    |
| Gaiella                      | 0.03 | -    | -    | 0.07 | -    | -    |
| Candidatus_Koribacter        | -    | -    | -    | -    | -    | 0.10 |
| Candidatus_Xiphinematobacter | 0.05 | -    | -    | 0.02 | -    | -    |
| Saccharothrix                | -    | -    | -    | 0.10 | -    | -    |
| Singulisphaera               | -    | -    | -    | 0.09 | -    | -    |
| Cryptosporangium             | 0.06 | -    | -    | 0.03 | -    | -    |

|                                  |      |   |   |      |   |   |  |      |   |   |   |   |      |  |   |   |   |      |      |   |
|----------------------------------|------|---|---|------|---|---|--|------|---|---|---|---|------|--|---|---|---|------|------|---|
| <i>Luteibacter</i>               | -    | - | - | 0.09 | - | - |  | -    | - | - | - | - | -    |  | - | - | - | -    | -    | - |
| <i>Herbaspirillum</i>            | 0.09 | - | - | -    | - | - |  | -    | - | - | - | - | -    |  | - | - | - | -    | -    | - |
| <i>Ideonella</i>                 | 0.09 | - | - | -    | - | - |  | -    | - | - | - | - | -    |  | - | - | - | -    | -    | - |
| <i>Actinoallomurus</i>           | -    | - | - | 0.08 | - | - |  | -    | - | - | - | - | -    |  | - | - | - | -    | -    | - |
| <i>Nitrospira</i>                | 0.03 | - | - | 0.02 | - | - |  | -    | - | - | - | - | -    |  | - | - | - | 0.03 | -    | - |
| <i>Stenotrophobacter</i>         | 0.03 | - | - | -    | - | - |  | -    | - | - | - | - | -    |  | - | - | - | -    | 0.05 | - |
| <i>Sphingopyxis</i>              | 0.02 | - | - | 0.05 | - | - |  | -    | - | - | - | - | -    |  | - | - | - | -    | -    | - |
| <i>Aquisphaera</i>               | -    | - | - | 0.07 | - | - |  | -    | - | - | - | - | -    |  | - | - | - | -    | -    | - |
| <i>Flavitalea</i>                | 0.06 | - | - | -    | - | - |  | -    | - | - | - | - | -    |  | - | - | - | -    | -    | - |
| <i>Phaselicystis</i>             | 0.02 | - | - | 0.03 | - | - |  | -    | - | - | - | - | -    |  | - | - | - | -    | -    | - |
| <i>Paenibacillus</i>             | 0.02 | - | - | -    | - | - |  | -    | - | - | - | - | -    |  | - | - | - | -    | -    | - |
| <i>Pirellula</i>                 | 0.02 | - | - | 0.03 | - | - |  | -    | - | - | - | - | -    |  | - | - | - | -    | -    | - |
| <i>Nevskia</i>                   | -    | - | - | -    | - | - |  | -    | - | - | - | - | 0.03 |  | - | - | - | -    | -    | - |
| <i>Clostridium_sensu_stricto</i> | -    | - | - | -    | - | - |  | 0.03 | - | - | - | - | -    |  | - | - | - | -    | -    | - |
| <i>Pseudarthrobacter</i>         | 0.03 | - | - | -    | - | - |  | -    | - | - | - | - | -    |  | - | - | - | -    | -    | - |
| <i>Altererythrobacter</i>        | 0.03 | - | - | -    | - | - |  | -    | - | - | - | - | -    |  | - | - | - | -    | -    | - |
| <i>Rhizocola</i>                 | -    | - | - | 0.02 | - | - |  | -    | - | - | - | - | -    |  | - | - | - | -    | -    | - |
| <i>Romboutsia</i>                | -    | - | - | 0.02 | - | - |  | -    | - | - | - | - | -    |  | - | - | - | -    | -    | - |
| <i>Adhaeribacter</i>             | -    | - | - | 0.01 | - | - |  | -    | - | - | - | - | -    |  | - | - | - | -    | -    | - |
| <i>Rubrobacter</i>               | -    | - | - | 0.01 | - | - |  | -    | - | - | - | - | -    |  | - | - | - | -    | -    | - |

**Table S6.** Relative abundance (%) of bacteria identified at the phylum, class, family and/or order level and unassigned genera present in the microbiome of roots of soybean non-inoculated (control), inoculated with *Bradyrhizobium* spp., or co-inoculated adding *Azospirillum brasilense*.

| Genus                        | Soybean Roots |      |      |      |      |      |  |            |      |      |      |      |      |  |               |      |      |      |      |      |
|------------------------------|---------------|------|------|------|------|------|--|------------|------|------|------|------|------|--|---------------|------|------|------|------|------|
|                              | Control       |      |      |      |      |      |  | Inoculated |      |      |      |      |      |  | Co-inoculated |      |      |      |      |      |
|                              |               |      |      |      |      |      |  |            |      |      |      |      |      |  |               |      |      |      |      |      |
| R1                           | R2            | R3   | R4   | R5   | R6   | R1   |  | R2         | R3   | R4   | R5   | R6   | R1   |  | R2            | R3   | R4   | R5   | R6   |      |
| UnC Chitinophagaceae         | 1.81          | 1.84 | 2.34 | 1.37 | 2.38 | 1.27 |  | 1.49       | 1.85 | 1.99 | 1.79 | 2.71 | 1.39 |  | 1.30          | 1.84 | 1.42 | 2.65 | 1.31 | 1.29 |
| UnC Gammaproteobacteria I.S. | 1.27          | 1.72 | 1.05 | 1.12 | 1.20 | 1.43 |  | 0.91       | 1.17 | 1.17 | 1.29 | 1.83 | 1.53 |  | 0.76          | 1.09 | 0.98 | 1.46 | 1.19 | 0.93 |
| UnC Saccharimonadales        | 1.25          | -    | -    | 0.72 | 0.30 | -    |  | -          | -    | 0.93 | 0.52 | 1.45 | 0.17 |  | 0.76          | 5.61 | -    | 0.37 | 0.67 | 1.45 |
| UnC Xanthobacteraceae        | 0.66          | 0.89 | 0.94 | 1.04 | 1.04 | 0.66 |  | 0.75       | 1.60 | 0.35 | 1.27 | 0.37 | -    |  | 0.52          | 0.47 | -    | 0.82 | 0.44 | 0.46 |
| UnC Micropepsaceae           | 0.55          | -    | 0.84 | 0.64 | 0.59 | 0.79 |  | 0.73       | 0.64 | 0.61 | 0.54 | 0.54 | 1.25 |  | 0.33          | 0.53 | 0.52 | 0.51 | 0.24 | 0.41 |
| UnC Burkholderiaceae         | 0.65          | -    | 0.73 | 0.36 | 0.27 | -    |  | -          | -    | 0.32 | -    | -    | -    |  | 0.34          | 0.58 | -    | -    | 0.40 | 0.53 |
| UnC Acidobacteriia           | 0.32          | 0.30 | 0.26 | 0.31 | 0.07 | -    |  | 0.22       | 0.37 | 0.16 | 0.17 | 0.40 | 0.20 |  | 0.09          | 0.09 | 0.14 | 0.18 | 0.09 | -    |
| UnC Acidobacteriales         | 0.50          | -    | 0.20 | 0.43 | 0.17 | 0.07 |  | 0.32       | 0.20 | 0.24 | 0.11 | 0.44 | -    |  | 0.04          | -    | 0.10 | 0.16 | 0.08 | 0.10 |
| UnC Acidobacteria            | 0.70          | 0.58 | 0.10 | 0.83 | -    | -    |  | 0.22       | 0.11 | -    | 0.17 | 0.04 | -    |  | 0.06          | -    | 0.13 | -    | 0.05 | -    |
| UnC Acidobacteriaceae        | 0.02          | -    | -    | -    | -    | -    |  | -          | -    | -    | -    | -    | -    |  | -             | -    | -    | -    | -    | -    |
| UnC Myxococcales             | 0.16          | -    | 0.08 | 0.19 | 0.09 | 0.04 |  | -          | -    | 0.10 | 0.01 | 0.15 | -    |  | -             | 0.04 | -    | 0.01 | 0.04 | -    |
| UnC Tepidisphaerales         | 0.21          | -    | 0.09 | 0.16 | -    | -    |  | -          | 0.08 | -    | -    | -    | 0.07 |  | -             | 0.06 | -    | -    | 0.04 | -    |
| UnC Pyrinomonadaceae         | 0.21          | -    | -    | 0.21 | -    | -    |  | -          | -    | -    | 0.22 | -    | -    |  | -             | -    | -    | -    | -    | -    |
| UnC Acidimicrobiia           | 0.15          | -    | -    | 0.30 | -    | -    |  | -          | 0.04 | -    | -    | 0.04 | -    |  | -             | -    | -    | -    | 0.04 | 0.04 |
| UnC Magnetospirillaceae      | -             | -    | -    | -    | -    | 0.53 |  | -          | -    | -    | -    | -    | -    |  | -             | -    | -    | -    | -    | -    |
| UnC Gaiellales               | 0.21          | -    | -    | 0.32 | -    | -    |  | -          | -    | -    | -    | -    | -    |  | -             | -    | -    | -    | -    | -    |
| UnC Sphingomonadaceae        | 0.16          | -    | -    | 0.19 | -    | -    |  | -          | -    | -    | -    | -    | -    |  | -             | -    | -    | -    | -    | -    |
| UnC Pedosphaeraceae          | 0.05          | -    | 0.07 | 0.08 | -    | -    |  | -          | 0.02 | -    | -    | 0.07 | -    |  | -             | -    | -    | -    | -    | -    |
| UnC Methylobacteriaceae      | 0.09          | -    | -    | 0.16 | -    | -    |  | -          | -    | -    | -    | -    | -    |  | -             | -    | -    | -    | 0.04 | -    |
| UnC Solirubrobacterales      | 0.02          | -    | -    | 0.25 | -    | -    |  | -          | -    | -    | -    | -    | -    |  | -             | -    | -    | -    | -    | -    |
| UnC Steroidobacteraceae      | 0.06          | -    | -    | 0.08 | -    | -    |  | -          | -    | -    | -    | -    | -    |  | -             | -    | 0.11 | -    | -    | -    |
| UnC Deltaproteobacteria      | 0.02          | -    | -    | 0.02 | -    | -    |  | -          | 0.15 | -    | -    | -    | -    |  | 0.04          | -    | -    | -    | -    | -    |
| UnC Chloroflexi              | 0.07          | -    | -    | 0.15 | -    | -    |  | -          | -    | -    | -    | -    | -    |  | -             | -    | -    | -    | -    | -    |
| UnC Micromonosporaceae       | 0.09          | -    | -    | 0.13 | -    | -    |  | -          | -    | -    | -    | -    | -    |  | -             | -    | -    | -    | -    | -    |
| UnC Blastocatellaceae        | 0.03          | -    | -    | 0.07 | -    | -    |  | -          | -    | -    | 0.03 | -    | -    |  | -             | -    | 0.07 | -    | -    | -    |
| UnC Ilumatobacteraceae       | 0.10          | -    | -    | 0.04 | -    | -    |  | -          | -    | -    | -    | -    | -    |  | -             | -    | -    | -    | -    | -    |

|                           |       |       |      |       |       |       |      |       |       |       |       |       |       |       |       |       |       |       |
|---------------------------|-------|-------|------|-------|-------|-------|------|-------|-------|-------|-------|-------|-------|-------|-------|-------|-------|-------|
| UnC Alphaproteobacteria   | 0.05  | -     | -    | 0.08  | -     | -     | -    | -     | -     | -     | -     | -     | -     | -     | -     | -     | -     | -     |
| UnC Fimbriimonadaceae     | 0.12  | -     | -    | -     | -     | -     | -    | -     | -     | -     | -     | -     | -     | -     | -     | -     | -     | -     |
| UnC Betaproteobacteriales | -     | -     | -    | -     | -     | -     | -    | -     | 0.07  | -     | -     | -     | -     | -     | -     | 0.04  | -     | -     |
| UnC Rokubacteria          | 0.06  | -     | -    | 0.05  | -     | -     | -    | -     | -     | -     | -     | -     | -     | -     | -     | -     | -     | -     |
| UnC Caulobacteraceae      | 0.06  | -     | -    | 0.05  | -     | -     | -    | -     | -     | -     | -     | -     | -     | -     | -     | -     | -     | -     |
| UnC Frankiales            | -     | -     | -    | 0.10  | -     | -     | -    | -     | -     | -     | -     | -     | -     | -     | -     | -     | -     | -     |
| UnC Acetobacteraceae      | -     | -     | -    | 0.10  | -     | -     | -    | -     | -     | -     | -     | -     | -     | -     | -     | -     | -     | -     |
| UnC Gemmatimonadaceae     | 0.02  | -     | -    | 0.08  | -     | -     | -    | -     | -     | -     | -     | -     | -     | -     | -     | -     | -     | -     |
| UnC Microscillaceae       | 0.05  | -     | -    | 0.03  | -     | -     | -    | -     | -     | -     | -     | -     | -     | -     | -     | -     | -     | -     |
| UnC Rhodospirillaceae     | 0.04  | -     | -    | 0.04  | -     | -     | -    | -     | -     | -     | -     | -     | -     | -     | -     | -     | -     | -     |
| UnC Holophagae            | 0.04  | -     | -    | 0.04  | -     | -     | -    | -     | -     | -     | -     | -     | -     | -     | -     | -     | -     | -     |
| UnC Microtrichales        | 0.07  | -     | -    | -     | -     | -     | -    | -     | -     | -     | -     | -     | -     | -     | -     | -     | -     | -     |
| UnC Rhizobiales           | 0.02  | -     | 0.02 | 0.01  | -     | -     | -    | -     | -     | -     | -     | -     | -     | -     | -     | 0.02  | -     | -     |
| UnC Hyphomonadaceae       | 0.03  | -     | -    | -     | -     | -     | -    | -     | 0.02  | -     | -     | -     | -     | -     | -     | -     | -     | -     |
| UnC Blastocatellia        | 0.05  | -     | -    | -     | -     | -     | -    | -     | -     | -     | -     | -     | -     | -     | -     | -     | -     | -     |
| UnC Elsterales            | -     | -     | -    | 0.05  | -     | -     | -    | -     | -     | -     | -     | -     | -     | -     | -     | -     | -     | -     |
| UnC Gemmataceae           | -     | -     | -    | 0.04  | -     | -     | -    | -     | -     | -     | -     | -     | -     | -     | -     | -     | -     | -     |
| UnC Planctomycetales      | -     | -     | -    | 0.04  | -     | -     | -    | -     | -     | -     | -     | -     | -     | -     | -     | -     | -     | -     |
| UnC Gammaproteobacteria   | -     | -     | -    | 0.02  | -     | -     | -    | -     | -     | -     | -     | -     | -     | -     | -     | -     | -     | -     |
| UnC Sandaracinaceae       | -     | -     | -    | 0.02  | -     | -     | -    | -     | -     | -     | -     | -     | -     | -     | -     | -     | -     | -     |
| UnC Actinobacteria        | 0.01  | -     | -    | 0.02  | -     | -     | -    | -     | -     | -     | -     | -     | -     | -     | -     | -     | -     | -     |
| UnC Pirellulaceae         | -     | -     | -    | 0.02  | -     | -     | -    | -     | -     | -     | -     | -     | -     | -     | -     | -     | -     | -     |
| UnC Rubinisphaeraceae     | -     | -     | -    | 0.02  | -     | -     | -    | -     | -     | -     | -     | -     | -     | -     | -     | -     | -     | -     |
| UnC Dehalococcoidia       | -     | -     | -    | 0.02  | -     | -     | -    | -     | -     | -     | -     | -     | -     | -     | -     | -     | -     | -     |
| UnC Nitrosomonadaceae     | -     | -     | -    | 0.01  | -     | -     | -    | -     | -     | -     | -     | -     | -     | -     | -     | -     | -     | -     |
| UnC Azospirillales        | 0.01  | -     | -    | -     | -     | -     | -    | -     | -     | -     | -     | -     | -     | -     | -     | -     | -     | -     |
| Unassigned                | 14.90 | 14.82 | 8.82 | 10.44 | 12.37 | 19.33 | 9.93 | 13.73 | 14.30 | 14.30 | 16.20 | 16.00 | 11.16 | 15.04 | 12.06 | 14.00 | 14.58 | 12.50 |

**Table S7.** Relative abundance (%) of the genera present in the microbiome of nodules of common bean non-inoculated (control), inoculated with *Rhizobium tropici*, or co-inoculated adding *Azospirillum brasilense*.

[illegible]

|                          |      |   |      |   |      |      |  |   |   |       |      |       |      |  |       |       |   |      |      |   |
|--------------------------|------|---|------|---|------|------|--|---|---|-------|------|-------|------|--|-------|-------|---|------|------|---|
| <i>Nocardioides</i>      | -    | - | -    | - | 0.02 | 0.03 |  | - | - | -     | -    | -     | 0.01 |  | -     | -     | - | -    | -    | - |
| <i>Nordella</i>          | -    | - | -    | - | -    | 0.02 |  | - | - | -     | -    | -     | 0.02 |  | -     | -     | - | -    | -    | - |
| <i>Pelomonas</i>         | -    | - | -    | - | -    | 0.11 |  | - | - | -     | -    | -     | -    |  | -     | -     | - | 0.11 | -    | - |
| <i>Phenylobacterium</i>  | -    | - | -    | - | -    | 0.04 |  | - | - | -     | -    | -     | 0.06 |  | -     | -     | - | -    | -    | - |
| <i>Pseudolabrys</i>      | -    | - | -    | - | -    | -    |  | - | - | -     | 0.01 | -     | -    |  | -     | -     | - | -    | -    | - |
| <i>Rhizobacter</i>       | -    | - | -    | - | -    | 0.07 |  | - | - | -     | -    | -     | -    |  | -     | -     | - | 0.05 | 0.07 | - |
| <i>Xylophilus</i>        | -    | - | -    | - | -    | 0.07 |  | - | - | -     | -    | 0.05  | 0.05 |  | -     | -     | - | -    | -    | - |
| <i>Sorangium</i>         | -    | - | -    | - | -    | -    |  | - | - | -     | -    | 0.01  | -    |  | -     | -     | - | -    | -    | - |
| <i>Bosea</i>             | 0.02 | - | -    | - | -    | 0.02 |  | - | - | -     | -    | -     | -    |  | -     | -     | - | -    | -    | - |
| <i>Haliangium</i>        | -    | - | 0.02 | - | -    | -    |  | - | - | -     | -    | -     | -    |  | -     | -     | - | -    | -    | - |
| <i>Luteolibacter</i>     | -    | - | 0.02 | - | -    | -    |  | - | - | -     | -    | -     | -    |  | -     | -     | - | -    | -    | - |
| <i>Bdellovibrio</i>      | -    | - | -    | - | -    | 0.02 |  | - | - | -     | -    | -     | -    |  | -     | -     | - | -    | -    | - |
| <i>Pseudarthrobacter</i> | -    | - | -    | - | -    | -    |  | - | - | -     | -    | -     | -    |  | -     | -     | - | 0.04 | -    | - |
| <i>Chryseolinea</i>      | -    | - | -    | - | -    | -    |  | - | - | -     | 0.01 | -     | -    |  | -     | 0.01  | - | 0.01 | -    | - |
| <i>Ohtaekwangia</i>      | -    | - | -    | - | -    | 0.03 |  | - | - | -     | -    | -     | -    |  | -     | -     | - | -    | -    | - |
| <i>Rubellimicrobium</i>  | -    | - | -    | - | -    | -    |  | - | - | -     | -    | -     | 0.01 |  | -     | -     | - | -    | -    | - |
| <i>Lapillicoccus</i>     | -    | - | -    | - | -    | 0.01 |  | - | - | -     | -    | -     | -    |  | -     | -     | - | -    | -    | - |
| <i>Microbispora</i>      | -    | - | -    | - | -    | -    |  | - | - | -     | -    | 0.01  | -    |  | -     | -     | - | -    | -    | - |
| <i>Terribacillus</i>     | -    | - | -    | - | -    | -    |  | - | - | -     | -    | 0.003 | -    |  | -     | -     | - | -    | -    | - |
| <i>Phycococcus</i>       | -    | - | -    | - | -    | -    |  | - | - | 0.005 | -    | -     | -    |  | -     | -     | - | -    | -    | - |
| <i>Sphaerisporangium</i> | -    | - | -    | - | -    | -    |  | - | - | -     | -    | -     | -    |  | -     | 0.003 | - | -    | -    | - |
| <i>Sphingobacterium</i>  | -    | - | -    | - | -    | -    |  | - | - | -     | -    | -     | -    |  | 0.005 | -     | - | -    | -    | - |
| <i>Dyella</i>            | -    | - | -    | - | -    | -    |  | - | - | -     | -    | -     | -    |  | 0.005 | -     | - | -    | -    | - |

**Table S8.** Relative abundance (%) of bacteria identified at the phylum, class, family and/or order and unassigned genera in the microbiome of nodules of common bean non-inoculated (control), inoculated with *Rhizobium tropici*, or co-inoculated adding *Azospirillum brasilense*.

| Genus                        | Common Bean Nodules |      |      |      |      |      |  |            |      |      |      |      |      |  |               |      |    |      |      |      |
|------------------------------|---------------------|------|------|------|------|------|--|------------|------|------|------|------|------|--|---------------|------|----|------|------|------|
|                              | Control             |      |      |      |      |      |  | Inoculated |      |      |      |      |      |  | Co-inoculated |      |    |      |      |      |
|                              | R1                  | R2   | R3   | R4   | R5   | R6   |  | R1         | R2   | R3   | R4   | R5   | R6   |  | R1            | R2   | R3 | R4   | R5   | R6   |
| Unc_Gammaproteobacteria I.S. | -                   | 0.01 | -    | 0.01 | -    | -    |  | -          | -    | -    | -    | -    | 0.01 |  | -             | -    | -  | -    | -    | 0.01 |
| Unc_Saccharimonadales        | -                   | 0.03 | 0.02 | -    | -    | 0.04 |  | 0.01       | -    | -    | -    | -    | 0.02 |  | -             | -    | -  | -    | -    | -    |
| Unc_Sandaracinaceae          |                     |      | 0.03 | 0.01 |      | 0.02 |  | -          | -    | -    | -    | -    | -    |  | -             | -    | -  | -    | -    | -    |
| Unc_Oligoflexales            | 0.02                | 0.04 | 0.03 |      |      | 0.07 |  | 0.02       | 0.05 | -    | -    | 0.01 | 0.06 |  | -             | -    | -  | 0.02 | -    | -    |
| Unc_Microscillaceae          | -                   | -    | -    | -    | -    | -    |  | -          | -    | -    | -    | -    | -    |  | -             | -    | -  | -    | -    | 0.01 |
| Unc_Myxococcales             | -                   | -    | -    | -    | -    | 0.02 |  | -          | -    | -    | -    | -    | -    |  | -             | -    | -  | -    | -    | -    |
| Unassigned                   | 0.56                | 0.09 | 0.69 | 0.17 | 0.32 | 0.86 |  | 0.06       | -    | 0.11 | 0.18 | 0.28 | 0.66 |  | 0.15          | 0.13 | -  | 0.51 | 0.12 | 0.20 |

**Table S9.** Relative abundance (%) of the genera present in the microbiome of roots of common bean non-inoculated (control), inoculated with *Rhizobium tropici*, or co-inoculated adding *Azospirillum brasilense*.

| Genus                                                     | Common Bean Root |       |       |       |       |      |            |       |       |       |       |       |               |       |       |       |       |       |
|-----------------------------------------------------------|------------------|-------|-------|-------|-------|------|------------|-------|-------|-------|-------|-------|---------------|-------|-------|-------|-------|-------|
|                                                           | Control          |       |       |       |       |      | Inoculated |       |       |       |       |       | Co-inoculated |       |       |       |       |       |
|                                                           | R1               | R2    | R3    | R4    | R5    | R6   | R1         | R2    | R3    | R4    | R5    | R6    | R1            | R2    | R3    | R4    | R5    | R6    |
| <i>Allorhizobium-Neorhizobium-Pararhizobium-Rhizobium</i> | 9.65             | 11.23 | 21.81 | 12.04 | 16.77 | 9.42 | 25.67      | 24.29 | 13.08 | 18.98 | 26.70 | 25.76 | 24.29         | 26.02 | 16.23 | 18.48 | 31.37 | 30.69 |
| <i>Achromobacter</i>                                      | 0.38             | 0.47  | 0.10  | 0.27  | 0.44  | 0.17 | 0.24       | 0.23  | 0.34  | 0.39  | 0.33  | 0.18  | 0.61          | 0.57  | 0.17  | 0.62  | 0.19  | 0.21  |
| <i>Aeromicrobium</i>                                      | 0.20             | 0.40  | 0.34  | 0.30  | 0.41  | 0.27 | 0.22       | 0.30  | 0.46  | 0.47  | 0.52  | 0.26  | 0.27          | 0.18  | 0.38  | 0.33  | 0.43  | 0.30  |
| <i>Asticcacaulis</i>                                      | 1.07             | 0.74  | 0.66  | 0.69  | 0.68  | 1.32 | 1.06       | 0.74  | 0.74  | 0.26  | 0.52  | 0.43  | 0.96          | 0.70  | 0.58  | 0.30  | 0.28  | 0.60  |
| <i>Bacillus</i>                                           | 1.37             | 1.56  | 0.63  | 0.93  | 1.12  | 1.38 | 1.72       | 1.25  | 1.26  | 1.47  | 1.80  | 1.01  | 2.00          | 1.39  | 0.99  | 1.11  | 1.17  | 0.97  |
| <i>Bradyrhizobium</i>                                     | 3.73             | 3.27  | 3.43  | 3.15  | 1.70  | 2.54 | 2.23       | 4.09  | 3.65  | 3.39  | 2.75  | 3.91  | 3.55          | 2.59  | 3.30  | 2.93  | 2.60  | 2.90  |
| <i>Burkholderia-Caballeronia-Paraburkholderia</i>         | 1.28             | 1.32  | 0.12  | 1.48  | 0.79  | 0.89 | 0.87       | 0.88  | 0.86  | 0.95  | 0.29  | 0.14  | 0.94          | 0.85  | 0.96  | 0.76  | 0.15  | 0.25  |
| <i>Caulobacter</i>                                        | 0.81             | 0.99  | 0.42  | 0.92  | 0.61  | 0.43 | 0.60       | 0.69  | 0.81  | 0.72  | 0.65  | 0.48  | 0.92          | 0.39  | 0.86  | 0.39  | 0.50  | 0.63  |
| <i>Chitinophaga</i>                                       | 1.12             | 1.49  | 0.97  | 1.97  | 2.02  | 1.09 | 1.10       | 1.16  | 1.57  | 1.75  | 1.05  | 1.06  | 0.83          | 1.38  | 1.31  | 1.72  | 1.42  | 1.68  |
| <i>Devosia</i>                                            | 1.70             | 3.09  | 1.93  | 3.04  | 2.33  | 2.05 | 1.29       | 2.15  | 2.96  | 2.59  | 2.62  | 2.52  | 2.06          | 1.67  | 2.11  | 2.18  | 1.89  | 1.79  |
| <i>Dongia</i>                                             | 0.18             | 0.14  | 0.10  | 0.22  | 0.14  | 0.15 | 0.17       | 0.22  | 0.19  | 0.25  | 0.25  | 0.21  | 0.18          | 0.17  | 0.35  | 0.15  | 0.08  | 0.26  |
| <i>Dyadobacter</i>                                        | 2.14             | 3.69  | 3.00  | 4.40  | 3.58  | 4.02 | 2.68       | 2.89  | 4.41  | 4.47  | 3.07  | 2.82  | 2.75          | 1.89  | 4.90  | 1.69  | 2.79  | 1.83  |
| <i>Dyella</i>                                             | 0.17             | 0.17  | 0.15  | 0.26  | 0.47  | 0.10 | 0.28       | 0.18  | 0.17  | 0.30  | 0.24  | 0.14  | 0.29          | 0.12  | 0.17  | 0.26  | 0.16  | 0.16  |
| <i>Flavisolibacter</i>                                    | 0.35             | 0.26  | 0.39  | 0.33  | 0.29  | 0.37 | 0.33       | 0.67  | 0.13  | 0.29  | 0.26  | 0.29  | 0.36          | 0.35  | 0.44  | 0.37  | 0.43  | 0.31  |
| <i>Lysobacter</i>                                         | 0.38             | 0.46  | 0.23  | 0.52  | 0.36  | 0.34 | 0.28       | 0.29  | 0.59  | 0.55  | 0.38  | 0.13  | 0.26          | 0.36  | 0.27  | 0.39  | 0.41  | 0.35  |
| <i>Massilia</i>                                           | 9.81             | 10.10 | 6.23  | 6.62  | 6.22  | 6.72 | 10.06      | 7.67  | 6.44  | 5.83  | 6.84  | 3.30  | 7.57          | 6.72  | 6.90  | 7.39  | 5.41  | 8.02  |
| <i>Methylobacterium</i>                                   | 0.13             | 0.30  | 0.03  | 0.18  | 0.08  | 0.05 | 0.20       | 0.08  | 0.16  | 0.07  | 0.13  | 0.06  | 0.10          | 0.06  | 0.06  | 0.16  | 0.06  | 0.13  |
| <i>Methylophilus</i>                                      | 0.46             | 0.50  | 0.76  | 1.12  | 0.92  | 0.63 | 0.98       | 0.74  | 0.56  | 0.93  | 0.31  | 0.57  | 0.46          | 0.65  | 0.83  | 0.52  | 0.61  | 0.44  |
| <i>Microvirga</i>                                         | 0.44             | 0.53  | 0.27  | 0.27  | 0.25  | 0.36 | 0.22       | 0.37  | 0.40  | 0.28  | 0.47  | 0.18  | 0.28          | 0.25  | 0.14  | 0.43  | 0.32  | 0.28  |
| <i>Niastella</i>                                          | 1.20             | 1.32  | 2.24  | 1.89  | 1.48  | 1.47 | 1.46       | 1.64  | 2.02  | 1.68  | 1.19  | 1.47  | 1.07          | 1.46  | 1.99  | 1.50  | 1.60  | 1.05  |
| <i>Novosphingobium</i>                                    | 5.97             | 3.75  | 2.42  | 2.35  | 2.96  | 2.33 | 2.42       | 2.28  | 3.22  | 2.84  | 2.26  | 1.84  | 2.72          | 2.40  | 2.48  | 2.57  | 2.51  | 3.72  |
| <i>Paenibacillus</i>                                      | 0.18             | 0.23  | 0.07  | 0.16  | 0.26  | 0.24 | 0.26       | 0.18  | 0.29  | 0.48  | 0.17  | 0.09  | 0.24          | 0.10  | 0.27  | 0.09  | 0.21  | 0.30  |
| <i>Phenylobacterium</i>                                   | 0.77             | 0.59  | 0.55  | 0.48  | 0.28  | 0.48 | 0.53       | 0.50  | 0.60  | 0.54  | 0.47  | 0.42  | 0.64          | 0.69  | 0.54  | 0.88  | 0.54  | 0.82  |
| <i>Rhizobacter</i>                                        | 0.69             | 0.32  | 1.65  | 0.86  | 0.70  | 1.86 | 0.39       | 0.67  | 1.20  | 0.72  | 0.34  | 1.28  | 0.26          | 0.36  | 1.00  | 1.64  | 0.60  | 0.47  |
| <i>Sphingomonas</i>                                       | 3.63             | 4.69  | 2.59  | 3.19  | 2.65  | 2.36 | 2.67       | 2.77  | 3.16  | 3.04  | 2.41  | 2.40  | 2.13          | 1.93  | 2.08  | 2.57  | 2.62  | 2.53  |



|                           |      |       |      |      |       |       |      |      |      |      |      |      |      |       |      |       |      |      |
|---------------------------|------|-------|------|------|-------|-------|------|------|------|------|------|------|------|-------|------|-------|------|------|
| <i>Streptomyces</i>       | 9.11 | 10.36 | 7.20 | 7.17 | 13.90 | 13.03 | 8.87 | 6.67 | 6.84 | 8.64 | 6.16 | 4.30 | 6.89 | 11.86 | 4.74 | 10.24 | 8.17 | 9.55 |
| <i>Xylophilus</i>         | 1.02 | 0.79  | 1.01 | 0.53 | 0.87  | 1.13  | 0.52 | 0.59 | 0.60 | 1.05 | 0.85 | 1.01 | 0.52 | 0.45  | 0.83 | 0.72  | 0.70 | 1.01 |
| <i>Sphaerisporangium</i>  | 0.20 | 0.32  | 0.20 | 0.19 | 0.17  | 0.21  | 0.36 | 0.21 | 0.21 | 0.20 | 0.20 | 0.25 | 0.27 | 0.25  | 0.12 | 0.28  | 0.28 | 0.25 |
| <i>Haliangium</i>         | 0.37 | 0.40  | 0.55 | 0.73 | 0.43  | 0.48  | 0.44 | 0.46 | 0.15 | 0.34 | 0.37 | 0.45 | 0.53 | 0.78  | 0.40 | 0.64  | 0.50 | 0.47 |
| <i>Ideonella</i>          | 0.38 | 0.99  | 0.20 | 0.27 | 0.45  | 0.42  | 0.60 | 0.43 | 0.67 | 0.25 | 0.40 | 0.30 | 0.19 | 0.29  | 0.66 | 0.60  | 0.47 | 0.44 |
| <i>Phaselicystis</i>      | 0.17 | 0.18  | 0.36 | 0.21 | 0.19  | 0.24  | 0.31 | 0.27 | 0.16 | 0.34 | 0.34 | 0.30 | 0.25 | 0.15  | 0.21 | 0.29  | 0.23 | 0.20 |
| <i>Pseudarthrobacter</i>  | 0.29 | 1.42  | 0.23 | 0.38 | 0.45  | 0.68  | 0.31 | 0.27 | 0.55 | 0.65 | 0.53 | 0.36 | 0.25 | 0.18  | 0.34 | 0.43  | 0.52 | 0.43 |
| <i>Altererythrobacter</i> | 0.29 | 0.37  | 0.23 | 0.21 | 0.06  | 0.28  | 0.36 | 0.24 | 0.14 | 0.41 | 0.20 | 0.16 | 0.47 | 0.27  | 0.21 | 0.15  | 0.36 | 0.44 |
| <i>Hydrogenophaga</i>     | 0.33 | 0.67  | 0.45 | 0.93 | 0.92  | 0.60  | 0.38 | 0.42 | 0.54 | 0.54 | 0.41 | 0.56 | 0.54 | 0.60  | 0.64 | 1.54  | 1.19 | 0.40 |
| <i>Methylibium</i>        | 0.15 | 0.37  | 0.67 | 0.41 | 0.35  | 0.46  | 0.27 | 0.32 | 0.45 | 0.51 | 0.57 | 0.34 | 0.26 | 0.44  | 0.59 | 0.57  | 0.33 | 0.54 |
| <i>Chryseolinea</i>       | 0.30 | 0.24  | 0.32 | 0.44 | 0.35  | 0.54  | 0.30 | 0.28 | 0.43 | 0.35 | 0.37 | 0.33 | 0.29 | 0.28  | 0.35 | 0.34  | 0.44 | 0.20 |
| <i>Fluviicola</i>         | 0.37 | 0.33  | 0.59 | 0.28 | 0.42  | 0.96  | 0.42 | 0.46 | 0.46 | 0.12 | 0.31 | 0.34 | 0.16 | 0.27  | 0.61 | 0.33  | 0.34 | 0.25 |
| <i>Tumebacillus</i>       | 0.16 | 0.14  | 0.06 | 0.14 | 0.06  | 0.17  | 0.38 | 0.29 | 0.09 | 0.17 | 0.13 | 0.09 | 0.22 | 0.16  | 0.17 | 0.07  | 0.07 | 0.05 |
| <i>Mesorhizobium</i>      | 0.20 | 0.34  | 0.24 | 0.49 | 0.27  | 0.21  | 0.14 | 0.24 | 0.24 | 0.24 | 0.31 | 0.24 | -    | 0.15  | 0.27 | 0.13  | 0.19 | -    |
| <i>Hyphomicrobium</i>     | 0.23 | 0.18  | 0.26 | 0.19 | 0.27  | -     | 0.32 | 0.36 | 0.33 | 0.19 | 0.27 | 0.33 | 0.39 | 0.27  | 0.18 | 0.37  | -    | 0.21 |
| <i>Micromonospora</i>     | 0.13 | 0.23  | 0.09 | 0.18 | 0.10  | -     | 0.16 | 0.11 | 0.16 | 0.15 | 0.11 | 0.08 | 0.14 | 0.17  | -    | -     | -    | -    |
| <i>Nocardioides</i>       | 0.25 | 0.48  | 0.13 | 0.41 | 0.31  | 0.35  | 0.13 | 0.22 | 0.31 | 0.29 | 0.27 | -    | 0.07 | 0.17  | 0.12 | 0.23  | 0.19 | 0.21 |
| <i>Nordella</i>           | 0.08 | 0.19  | 0.09 | 0.11 | 0.10  | 0.08  | 0.06 | 0.06 | 0.11 | 0.12 | 0.10 | 0.09 | 0.04 | 0.05  | 0.08 | 0.09  | -    | 0.08 |
| <i>Paenarthrobacter</i>   | 0.71 | 1.65  | 0.65 | 1.33 | 0.88  | 1.16  | 0.26 | 0.48 | 1.12 | 1.43 | 1.39 | 0.84 | 0.55 | -     | 0.89 | 0.95  | 1.06 | 0.77 |
| <i>Pelomonas</i>          | 0.26 | 0.17  | 0.18 | -    | -     | 0.36  | -    | 0.22 | 0.32 | 0.25 | 0.25 | 0.24 | 0.13 | 0.27  | 0.15 | 1.28  | 0.63 | -    |
| <i>Pseudoduganella</i>    | 0.19 | 0.25  | 0.18 | 0.15 | -     | 0.23  | 0.27 | 0.18 | 0.32 | 0.22 | -    | 0.13 | 0.19 | 0.17  | 0.20 | 0.11  | 0.13 | -    |
| <i>Pseudolabrys</i>       | 0.16 | 0.18  | 0.19 | 0.17 | 0.16  | -     | 0.14 | 0.16 | 0.13 | 0.15 | 0.17 | 0.18 | 0.25 | 0.11  | -    | 0.13  | -    | -    |
| <i>Sorangium</i>          | 0.10 | 0.18  | -    | 0.15 | 0.12  | 0.13  | 0.17 | 0.21 | 0.14 | 0.16 | 0.25 | -    | 0.09 | -     | 0.04 | -     | 0.18 | 0.26 |
| <i>Bosea</i>              | 0.06 | 0.04  | 0.16 | 0.09 | 0.15  | 0.07  | 0.08 | 0.18 | 0.09 | -    | 0.17 | 0.26 | 0.11 | 0.14  | 0.19 | 0.14  | 0.16 | 0.16 |
| <i>Luteolibacter</i>      | 0.18 | 0.16  | 0.41 | 0.11 | 0.33  | 0.22  | -    | 0.13 | 0.26 | 0.26 | 0.17 | 0.39 | 0.05 | 0.16  | -    | 0.07  | -    | 0.17 |
| <i>Bdellovibrio</i>       | 0.23 | -     | 0.19 | 0.04 | 0.08  | 0.23  | 0.08 | 0.08 | 0.07 | -    | 0.03 | 0.02 | 0.09 | 0.13  | 0.18 | 0.09  | 0.06 | 0.08 |
| <i>Flavitalea</i>         | 0.13 | 0.36  | 0.15 | 0.27 | 0.16  | 0.23  | -    | 0.14 | 0.17 | 0.13 | 0.15 | 0.21 | -    | 0.14  | 0.17 | 0.11  | -    | -    |
| <i>Caenimonas</i>         | -    | 0.54  | 0.38 | 0.36 | 0.17  | -     | -    | 0.36 | 0.33 | -    | 0.43 | 0.22 | 0.31 | 0.30  | 0.37 | 0.41  | -    | 0.47 |
| <i>Pajaroellobacter</i>   | 0.40 | 0.11  | 0.18 | 0.11 | 0.09  | 0.13  | 0.10 | -    | 0.16 | 0.13 | 0.14 | 0.14 | 0.12 | -     | 0.14 | -     | 0.07 | -    |
| <i>Emticicia</i>          | 0.10 | 0.12  | 0.35 | 0.29 | 0.16  | 0.36  | 0.20 | 0.23 | 0.26 | 0.16 | 0.20 | 0.25 | 0.15 | 0.16  | 0.35 | 0.11  | 0.17 | -    |
| <i>Phycococcus</i>        | -    | 0.12  | 0.14 | 0.20 | 0.12  | 0.15  | -    | -    | 0.17 | 0.12 | 0.15 | 0.19 | -    | -     | 0.11 | 0.08  | 0.18 | -    |
| <i>Ferruginibacter</i>    | 0.09 | 0.12  | 0.09 | -    | 0.06  | 0.16  | 0.18 | 0.13 | 0.06 | -    | -    | 0.07 | 0.09 | -     | 0.04 | 0.07  | -    | 0.05 |
| <i>Agromyces</i>          | 0.02 | 0.06  | -    | 0.04 | -     | 0.06  | 0.04 | -    | -    | -    | -    | 0.02 | 0.05 | -     | -    | 0.06  | -    | -    |

|                                     |      |      |      |      |      |      |      |      |      |      |      |      |      |      |      |      |      |      |
|-------------------------------------|------|------|------|------|------|------|------|------|------|------|------|------|------|------|------|------|------|------|
| <i>Amycolatopsis</i>                | -    | 0.06 | -    | -    | 0.03 | 0.04 | 0.07 | -    | -    | -    | 0.03 | 0.05 | -    | 0.05 | 0.02 | -    | 0.06 | 0.05 |
| <i>Aridibacter</i>                  | 0.15 | 0.06 | -    | -    | -    | -    | 0.20 | -    | 0.10 | -    | -    | 0.10 | -    | -    | 0.12 | -    | -    | -    |
| <i>Candidatus Udaeobacter</i>       | 0.11 | 0.16 | -    | -    | 0.03 | 0.10 | 0.15 | 0.06 | -    | 0.03 | -    | 0.03 | 0.04 | 0.07 | 0.01 | -    | -    | -    |
| <i>Candidatus_Xiphinematobacter</i> | 0.02 | 0.02 | -    | 0.01 | -    | -    | 0.03 | -    | 0.01 | -    | -    | -    | -    | -    | -    | -    | -    | -    |
| <i>Nitrospira</i>                   | 0.08 | 0.12 | 0.02 | 0.06 | 0.04 | 0.07 | 0.04 | 0.04 | -    | 0.04 | 0.04 | -    | 0.02 | -    | 0.01 | -    | -    | -    |
| <i>Stenotrophobacter</i>            | 0.11 | 0.09 | -    | 0.05 | 0.05 | 0.12 | 0.09 | -    | -    | -    | -    | -    | -    | -    | -    | -    | 0.04 | -    |
| <i>Steroidobacter</i>               | 0.04 | -    | -    | 0.16 | 0.16 | -    | 0.08 | 0.20 | -    | 0.09 | 0.06 | -    | -    | 0.14 | 0.11 | -    | -    | 0.16 |
| <i>Arthrobacter</i>                 | -    | 0.41 | -    | 0.25 | 0.29 | -    | 0.22 | -    | 0.30 | 0.31 | 0.29 | -    | -    | -    | 0.30 | 0.20 | 0.27 | 0.20 |
| <i>Pseudorhodoferax</i>             | 0.18 | 0.46 | -    | 0.06 | -    | 0.14 | 0.09 | 0.08 | 0.16 | 0.06 | -    | 0.15 | -    | 0.07 | 0.09 | -    | 0.28 | 0.18 |
| <i>Roseimicrobium</i>               | 0.22 | 0.07 | -    | 0.09 | -    | 0.07 | 0.05 | 0.06 | 0.09 | 0.03 | -    | -    | 0.03 | -    | 0.06 | 0.07 | 0.05 | 0.12 |
| <i>Labrys</i>                       | -    | -    | -    | -    | 0.04 | 0.07 | -    | 0.11 | -    | -    | -    | -    | -    | 0.07 | 0.08 | 0.06 | 0.09 | -    |
| <i>Brevundimonas</i>                | -    | 0.23 | -    | 0.11 | -    | 0.17 | -    | -    | 0.08 | -    | 0.08 | -    | -    | 0.26 | -    | 0.22 | 0.13 | 0.12 |
| <i>Bryobacter</i>                   | -    | 0.16 | -    | -    | -    | -    | -    | -    | -    | -    | -    | -    | -    | -    | -    | 0.02 | -    | -    |
| <i>Rhodoplanes</i>                  | 0.20 | 0.24 | 0.13 | 0.21 | -    | -    | -    | 0.19 | 0.24 | 0.10 | 0.14 | 0.29 | -    | 0.12 | 0.11 | 0.13 | 0.25 | 0.13 |
| <i>Rhodopseudomonas</i>             | -    | 0.09 | -    | -    | -    | -    | -    | 0.07 | -    | -    | 0.14 | -    | -    | -    | -    | -    | -    | -    |
| <i>Shinella</i>                     | -    | 0.19 | -    | -    | -    | 0.31 | -    | -    | 0.24 | -    | -    | 0.32 | -    | -    | -    | 1.18 | 0.72 | -    |
| <i>Ramlibacter</i>                  | 0.40 | 0.45 | -    | -    | 0.15 | 0.48 | 0.35 | -    | 0.47 | 0.47 | -    | 0.44 | 0.25 | 0.15 | -    | -    | -    | -    |
| <i>Acidovorax</i>                   | -    | -    | -    | -    | -    | 0.84 | -    | -    | 0.14 | 0.13 | 0.41 | 0.24 | -    | -    | 0.19 | 0.47 | -    | -    |
| <i>Ellin6067</i>                    | 0.26 | -    | 0.15 | -    | 0.08 | 0.17 | -    | 0.18 | -    | -    | -    | 0.11 | 0.21 | 0.15 | -    | -    | -    | -    |
| <i>Erythrobacter</i>                | -    | 0.14 | -    | -    | 0.22 | -    | 0.15 | -    | 0.08 | -    | 0.13 | -    | -    | -    | -    | -    | -    | 0.17 |
| <i>Ellin6055</i>                    | -    | 0.66 | -    | -    | 0.23 | -    | 0.38 | -    | 0.20 | -    | -    | -    | 0.19 | 0.22 | -    | -    | -    | 0.33 |
| <i>Pseudoflavitalea</i>             | 0.15 | 0.11 | -    | 0.04 | 0.14 | -    | -    | 0.16 | -    | -    | -    | -    | -    | 0.09 | -    | -    | -    | -    |
| <i>Noviherbaspirillum</i>           | -    | 0.20 | -    | -    | -    | 0.14 | -    | -    | -    | -    | -    | 0.13 | -    | 0.07 | 0.15 | 0.11 | -    | -    |
| <i>Cellulosimicrobium</i>           | -    | -    | -    | -    | -    | -    | -    | -    | 0.17 | -    | -    | -    | 0.11 | 0.04 | -    | 0.18 | -    | -    |
| <i>Niabella</i>                     | 0.02 | -    | 0.07 | 0.03 | 0.08 | 0.02 | -    | -    | 0.05 | 0.08 | -    | 0.07 | 0.04 | -    | -    | 0.01 | -    | -    |
| <i>Polaromonas</i>                  |      | 0.12 | -    | -    | -    | -    | -    | 0.19 | -    | -    | -    | -    | -    | -    | 0.10 | -    | -    | -    |
| <i>Cohnella</i>                     | 0.03 | 0.04 | -    | -    | 0.04 | -    | -    | -    | 0.06 | 0.06 | 0.09 | -    | -    | 0.05 | 0.02 | 0.03 | -    | -    |
| <i>Ohtaekwangia</i>                 | -    | -    | -    | -    | 0.14 | 0.20 | -    | 0.19 | -    | -    | 0.06 | 0.05 | -    | 0.04 | -    | 0.07 | 0.11 | 0.08 |
| <i>Taibaiella</i>                   | -    | -    | 0.03 | -    | -    | 0.06 | -    | -    | 0.05 | 0.17 | -    | 0.06 | -    | -    | -    | -    | -    | -    |
| <i>Lacunisphaera</i>                | -    | 0.08 | -    | 0.07 | 0.05 | -    | -    | -    | -    | 0.07 | -    | 0.09 | 0.05 | -    | -    | -    | -    | -    |
| <i>Luteimonas</i>                   | 0.08 | -    | 0.16 | -    | -    | -    | -    | 0.16 | 0.14 | -    | 0.16 | 0.26 | -    | 0.13 | -    | 0.23 | -    | -    |
| <i>Gaiella</i>                      | 0.02 | 0.05 | -    | -    | -    | -    | -    | -    | -    | -    | -    | -    | -    | -    | -    | -    | -    | -    |
| <i>Nonomuraea</i>                   | 0.08 | -    | -    | -    | -    | -    | 0.10 | -    | -    | -    | -    | -    | -    | 0.07 | -    | 0.10 | -    | -    |

|                   |      |      |      |      |      |      |
|-------------------|------|------|------|------|------|------|
| Tahibacter        | -    | -    | 0.23 | -    | -    | -    |
| Rubellimicrobium  | 0.03 | -    | -    | 0.02 | -    | -    |
| Terrimonas        | -    | -    | -    | 0.04 | -    | -    |
| Xenophilus        | -    | -    | -    | -    | -    | -    |
| Opitutus          | -    | -    | -    | -    | -    | -    |
| Chryseobacterium  | -    | -    | -    | -    | -    | -    |
| Comamonas         | -    | -    | 0.68 | -    | 0.20 | -    |
| Cupriavidus       | -    | 0.23 | -    | 0.08 | -    | -    |
| Dactylosporangium | -    | -    | -    | -    | -    | 0.03 |
| Flavobacterium    | 0.24 | -    | 0.44 | 0.20 | 0.04 | -    |
| Lechevalieria     | 0.09 | 0.15 | -    | -    | -    | -    |
| Leifsonia         | -    | 0.09 | -    | -    | 0.04 | 0.06 |
| Pseudomonas       | -    | 0.29 | -    | -    | 0.10 | -    |
| Pseudonocardia    | -    | -    | -    | -    | -    | 0.02 |
| Pseudoxanthomonas | -    | 0.01 | -    | -    | 0.22 | -    |
| Ralstonia         | 0.09 | 0.09 | -    | -    | -    | 0.07 |
| Brucella          | -    | -    | -    | 0.04 | -    | 0.07 |
| Lapillicoccus     | -    | 0.05 | -    | -    | -    | -    |
| Microbispora      | -    | -    | -    | -    | -    | -    |
| Blastococcus      | 0.04 | -    | -    | -    | -    | -    |
| Archangium        | -    | -    | -    | -    | -    | -    |
| Bauldia           | -    | -    | -    | -    | -    | -    |
| Blastocatella     | -    | -    | -    | -    | -    | -    |
| Terrabacter       | 0.14 | 0.17 | -    | -    | -    | -    |
| Intrasporangium   | -    | -    | -    | -    | 0.13 | 0.13 |
| Variovorax        | -    | 0.18 | -    | 0.09 | -    | -    |
| Mitsuaria         | -    | 0.41 | -    | -    | -    | -    |

|      |      |      |      |      |      |
|------|------|------|------|------|------|
| -    | -    | -    | 0.09 | -    | -    |
| -    | -    | 0.04 | -    | -    | 0.05 |
| -    | -    | -    | 0.07 | -    | 0.05 |
| -    | -    | 0.07 | -    | -    | 0.08 |
| -    | -    | -    | -    | -    | 0.12 |
| -    | -    | -    | -    | -    | 0.26 |
| -    | 0.25 | 0.55 | -    | -    | 0.81 |
| -    | -    | -    | 0.05 | -    | -    |
| -    | -    | -    | -    | -    | -    |
| -    | -    | -    | -    | 0.20 | -    |
| -    | -    | -    | -    | -    | -    |
| -    | -    | -    | -    | -    | -    |
| -    | 0.06 | -    | -    | -    | -    |
| -    | -    | -    | -    | -    | -    |
| -    | -    | 0.31 | -    | -    | -    |
| -    | -    | -    | -    | -    | -    |
| -    | -    | -    | -    | -    | 0.13 |
| -    | -    | -    | -    | -    | -    |
| -    | -    | -    | -    | -    | -    |
| -    | -    | -    | -    | -    | -    |
| -    | -    | -    | -    | -    | -    |
| -    | -    | -    | -    | -    | -    |
| -    | 0.18 | 0.06 | -    | -    | -    |
| 0.14 | -    | -    | -    | -    | -    |
| -    | -    | -    | 0.13 | 0.09 | -    |
| -    | -    | 0.14 | -    | -    | -    |
| -    | -    | -    | -    | -    | -    |

|      |      |      |      |      |      |
|------|------|------|------|------|------|
| -    | -    | -    | -    | -    | -    |
| 0.02 | -    | -    | 0.04 | -    | 0.04 |
| -    | -    | 0.09 | -    | -    | -    |
| -    | 0.10 | -    | -    | -    | -    |
| -    | -    | 0.12 | -    | -    | -    |
| -    | -    | -    | -    | -    | -    |
| 0.16 | -    | 0.34 | -    | -    | -    |
| -    | -    | 0.10 | -    | -    | -    |
| -    | -    | 0.06 | -    | -    | -    |
| -    | -    | -    | -    | -    | -    |
| -    | 0.11 | -    | -    | -    | -    |
| -    | -    | -    | 0.16 | -    | -    |
| -    | -    | -    | -    | -    | 0.35 |
| -    | -    | -    | 0.01 | -    | -    |
| -    | -    | -    | -    | -    | -    |
| -    | 0.07 | 0.18 | 0.30 | 0.23 | -    |
| -    | -    | -    | -    | -    | -    |
| -    | -    | -    | -    | -    | -    |
| -    | 0.04 | -    | -    | -    | -    |
| -    | -    | -    | -    | -    | -    |
| 0.03 | -    | -    | -    | -    | -    |
| -    | -    | -    | -    | -    | 0.01 |
| 0.08 | -    | -    | -    | -    | -    |
| 0.10 | 0.10 | -    | -    | -    | -    |
| -    | -    | -    | 0.11 | -    | 0.19 |
| -    | -    | -    | -    | -    | -    |
| -    | -    | -    | -    | -    | -    |

**Table S10.** Relative abundance (%) of bacteria identified at the phylum, class, family and/or order and unassigned genera in the microbiome of roots of common bean non-inoculated (control), inoculated with *Rhizobium tropici*, or co-inoculated adding *Azospirillum brasilense*.

| Genus                        | Common Bean Root |      |      |      |      |      |            |      |      |      |      |      |               |      |      |      |      |      |
|------------------------------|------------------|------|------|------|------|------|------------|------|------|------|------|------|---------------|------|------|------|------|------|
|                              | Control          |      |      |      |      |      | Inoculated |      |      |      |      |      | Co-inoculated |      |      |      |      |      |
|                              |                  |      |      |      |      |      | R1         | R2   | R3   | R4   | R5   | R6   | R1            | R2   | R3   | R4   | R5   | R6   |
| Unc Gammaproteobacteria_I.S. | 1.00             | 0.77 | 0.45 | 1.11 | 0.63 | 0.72 | 1.10       | 0.74 | 0.58 | 0.85 | 0.45 | 0.67 | 0.75          | 0.49 | 0.52 | 0.35 | 0.33 | 0.33 |
| Unc Chitinophagaceae         | 0.27             | 0.35 | 0.52 | 0.34 | 0.23 | 0.45 | 0.36       | 0.20 | 0.32 | 0.40 | 0.36 | 0.24 | 0.34          | 0.20 | 0.45 | 0.34 | 0.57 | 0.27 |
| Unc Sandaracinaceae          | 0.43             | 0.49 | 0.78 | 1.05 | 0.51 | 0.62 | 0.43       | 0.54 | 0.61 | 0.67 | 0.74 | 0.85 | 0.73          | 0.42 | 0.83 | 0.91 | 0.75 | 0.44 |
| Unc Oligoflexales            | 0.51             | 0.50 | 0.57 | 0.55 | 0.24 | 0.56 | 0.66       | 0.59 | 0.66 | 0.36 | 0.22 | 0.37 | 0.45          | 0.31 | 0.31 | 0.47 | 0.25 | 0.33 |
| Unc Sphingomonadaceae        | 0.92             | 0.34 | 0.27 | 0.59 | 0.44 | 0.69 | 0.32       | 0.47 | 0.63 | 0.35 | 0.72 | 0.12 | 0.47          | 0.39 | 0.22 | 0.45 | 0.16 | 0.37 |
| Unc Myxococcales             | 0.13             | 0.03 | 0.06 | 0.04 | 0.03 | 0.15 | 0.17       | 0.05 | 0.04 | 0.25 | 0.14 | 0.16 | 0.02          | 0.15 | 0.17 | 0.13 | 0.02 | 0.04 |
| Unc Saccharimonadales        | 0.25             | 0.56 | 0.10 | 0.43 | 0.12 | 0.34 | 0.17       | 0.11 | 0.06 | -    | 0.16 | -    | 0.27          | -    | 0.13 | 0.15 | 0.12 | 0.15 |
| Unc Xanthobacteraceae        | 0.19             | 0.17 | 0.10 | 0.12 | 0.10 | 0.11 | 0.17       | 0.13 | 0.20 | 0.16 | 0.11 | 0.10 | 0.13          | -    | 0.09 | 0.15 | 0.12 | 0.15 |
| Unc Micropepsaceae           | 0.27             | 0.17 | -    | 0.23 | -    | 0.10 | 0.21       | 0.17 | 0.13 | 0.13 | -    | -    | 0.18          | 0.10 | 0.12 | 0.13 | 0.14 | 0.18 |
| Unc Steroidobacteraceae      | 0.12             | 0.12 | 0.08 | 0.18 | 0.13 | 0.15 | 0.16       | -    | 0.07 | 0.10 | 0.08 | 0.11 | 0.27          | -    | -    | -    | 0.23 | 0.07 |
| Unc Acidobacteria            | 0.14             | 0.40 | -    | 0.19 | 0.13 | 0.35 | 0.26       | 0.09 | 0.03 | 0.05 | -    | 0.02 | -             | 0.05 | 0.05 | -    | 0.09 | -    |
| Unc Microscillaceae          | -                | 0.24 | 0.04 | 0.43 | 0.21 | 0.08 | 0.06       | -    | 0.13 | 0.35 | 0.24 | 0.33 | 0.21          | -    | 0.25 | -    | 0.34 | 0.05 |
| Unc Nitrosomonadaceae        | 0.12             | 0.04 | 0.09 | -    | -    | 0.04 | 0.15       | 0.15 | -    | 0.09 | -    | 0.10 | 0.04          | -    | 0.04 | 0.06 | 0.04 | -    |
| Unc Acidimicrobiia           | 0.02             | 0.08 | -    | 0.03 | 0.06 | 0.05 | 0.04       | -    | 0.02 | 0.04 | 0.03 | 0.04 | 0.02          | 0.02 | 0.01 | 0.04 | 0.06 | 0.07 |
| Unc Microbacteriaceae        | -                | -    | -    | 0.15 | 0.10 | -    | 0.26       | -    | 0.26 | 0.19 | 0.21 | -    | 0.22          | 0.10 | -    | -    | -    | -    |
| Unc Acidobacteriales         | 0.04             | -    | -    | 0.03 | -    | -    | 0.13       | -    | 0.03 | -    | 0.02 | -    | 0.04          | -    | -    | -    | 0.03 | -    |
| Unc Fimbriimonadaceae        | 0.10             | -    | 0.05 | 0.05 | 0.04 | -    | -          | -    | 0.06 | -    | -    | 0.06 | -             | 0.06 | -    | -    | -    | 0.05 |
| Unc Rubinisphaeraceae        | -                | 0.07 | 0.05 | 0.17 | 0.06 | -    | -          | -    | 0.12 | 0.04 | -    | -    | 0.04          | 0.04 | 0.07 | -    | 0.04 | -    |
| Unc Tepidisphaerales         | 0.07             | 0.12 | 0.04 | -    | -    | -    | 0.11       | -    | -    | 0.04 | 0.05 | -    | -             | 0.05 | 0.03 | -    | -    | -    |
| Unc Gaiellales               | -                | -    | 0.02 | -    | -    | 0.03 | 0.04       | -    | -    | -    | -    | -    | -             | -    | 0.02 | -    | -    | -    |
| Unc Holophagae               | -                | 0.05 | 0.10 | -    | -    | -    | 0.20       | -    | -    | -    | -    | -    | -             | -    | -    | -    | -    | -    |
| Unc Gammaproteobacteria      | -                | -    | -    | -    | -    | 0.08 | 0.08       | -    | 0.04 | -    | -    | -    | -             | -    | -    | 0.04 | -    | 0.04 |
| Unc Methyloligellaceae       | -                | -    | -    | 0.05 | 0.06 | -    | 0.07       | 0.11 | -    | -    | -    | 0.05 | 0.05          | -    | -    | -    | -    | 0.04 |
| Unc Gemmatimonadaceae        | 0.07             | 0.07 | 0.06 | -    | -    | 0.02 | 0.04       | 0.03 | 0.02 | -    | 0.01 | 0.01 | -             | -    | -    | -    | -    | -    |
| Unc Betaproteobacteriales    | 0.05             | 0.09 | -    | -    | -    | -    | -          | -    | -    | -    | -    | 0.03 | -             | -    | -    | 0.02 | -    | -    |
| Unc Solirubrobacterales      | -                | -    | -    | -    | -    | -    | -          | -    | -    | -    | -    | 0.01 | -             | -    | -    | -    | -    | -    |

|                      |       |       |       |       |       |       |  |       |       |       |       |       |       |  |       |       |       |       |       |       |
|----------------------|-------|-------|-------|-------|-------|-------|--|-------|-------|-------|-------|-------|-------|--|-------|-------|-------|-------|-------|-------|
| Unc Chloroflexi      | 0.04  | -     | -     | -     | -     | -     |  | 0.03  | -     | -     | -     | -     | -     |  | -     | -     | -     | -     | -     | -     |
| Unc Pedosphaeraceae  | 0.02  | 0.04  | -     | -     | 0.02  | -     |  | -     | -     | -     | -     | -     | -     |  | -     | -     | -     | -     | -     | -     |
| Unc Hyphomonadaceae  | -     | -     | -     | -     | -     | -     |  | -     | -     | -     | -     | -     | -     |  | 0.03  | -     | -     | -     | -     | -     |
| Unc Burkholderiaceae | -     | -     | -     | -     | -     | 0.42  |  | -     | -     | -     | -     | -     | -     |  | -     | -     | -     | -     | 0.30  | -     |
| Unassigned           | 21.57 | 15.74 | 19.70 | 20.12 | 13.44 | 22.97 |  | 13.55 | 14.58 | 19.78 | 17.19 | 13.65 | 14.21 |  | 12.50 | 13.99 | 21.32 | 19.84 | 13.95 | 14.70 |

**Table S11.** Statistical analysis of alpha-diversity in the microbiomes considering the treatments (non-inoculated, inoculated with specific rhizobia and co-inoculated with *A. brasilense* in soybean and common bean), and the matrix (nodule and root microbiomes).

#### Anova Shannon

```

      Df Sum Sq Mean Sq  F value    Pr(>F)
Matriz      1  296.78   296.78  5005.489 < 2e-16 ***
Treatment    2    0.80     0.40    6.777 0.00212 **
Matriz:Treatment  2    0.51     0.26    4.329 0.01718 *
Residuals   65    3.85     0.06
---
Signif. codes:  0 '***' 0.001 '**' 0.01 '*' 0.05 '.' 0.1 ' ' 1

```

#### Tukey

```

Root:Control      4.5920802 a
Root:Inoculated   4.3157360 ab
Root:Co-inoculated 4.1319400 b
Nodule:Inoculated 0.2827224 c
Nodule:Control    0.2703665 c
Nodule:Co-inoculated 0.2149949 c

```

#### Anova InvSimpson

```

      Df Sum Sq Mean Sq  F value    Pr(>F)
Matriz      1  22040   22040  200.865 < 2e-16 ***
Treatment    2   1527     763   6.958 0.00183 **
Matriz:Treatment  2   1469     734   6.693 0.00227 **
Residuals   65   7132     110
---
Signif. codes:  0 '***' 0.001 '**' 0.01 '*' 0.05 '.' 0.1 ' ' 1

```

#### Tukey

|                      | InvSimpson<br><dbl> | groups<br><chr> |
|----------------------|---------------------|-----------------|
| Root:Control         | 48.322636           | a               |
| Root:Inoculated      | 34.612664           | b               |
| Root:Co-inoculated   | 26.187459           | b               |
| Nodule:Inoculated    | 1.209538            | c               |
| Nodule:Control       | 1.109237            | c               |
| Nodule:Co-inoculated | 1.076225            | c               |

**Table S12.** Statistical analysis of beta-diversity in the microbiomes considering the treatments (non-inoculated, inoculated with specific rhizobia and co-inoculated with *A. brasilense*) the host legumes (soybean and common bean), and the matrix (nodule and root microbiomes).

Permanova

|                         | Df | SumOfSqs | R2      | F        | Pr(>F)   |
|-------------------------|----|----------|---------|----------|----------|
| Treatment               | 2  | 0.01361  | 0.00584 | 1.9662   | 0.0464 * |
| Treatment:Matriz        | 3  | 1.89648  | 0.81394 | 182.6826 | 0.0840 . |
| Treatment:Matriz:Legume | 6  | 0.21575  | 0.09260 | 10.3915  | 0.1513   |
| Residual                | 59 | 0.20417  | 0.08762 |          |          |
| Total                   | 70 | 2.33001  | 1.00000 |          |          |

---

Signif. codes: 0 '\*\*\*' 0.001 '\*\*' 0.01 '\*' 0.05 '.' 0.1 ' ' 1
